1 **The actin nucleator Spir-1 is a virus restriction factor that promotes IRF3 activation**

2

3 Alice Abreu Torres<sup>1</sup>, Stephanie L. Macilwee<sup>¶1</sup>, Amir Rashid<sup>1</sup>, Sarah E. Cox<sup>1</sup>, Jonas D. Albarnaz<sup>1</sup>,  
4 Claudio A. Bonjardim<sup>2</sup> & Geoffrey L. Smith<sup>1\*</sup>

5

6 <sup>1</sup>Department of Pathology, University of Cambridge, Tennis Court Road, CB1 2QP, Cambridge,  
7 United Kingdom

8 <sup>2</sup>Laboratório de Vírus, Departamento de Microbiologia, Instituto de Ciências Biológicas, Universidade  
9 Federal de Minas Gerais, Belo Horizonte, MG, Brazil.

10

11 <sup>¶</sup>Current address: Algal Omega 3, Penrhyn Rd, Knowsley, Prescott L34 9HY

12

13 \*Corresponding author: email, [gls37@cam.ac.uk](mailto:gls37@cam.ac.uk)

14

15 **Short title: Spir-1 is a virus restriction factor**

16

17 Key words: Spir-1, virus restriction factor, vaccinia virus, Zika virus, innate immunity, IRF3 activation,  
18 protein K7, immune evasion.

19

## 20 **Abstract**

21 Cellular proteins often have multiple and diverse functions. This is illustrated with protein Spir-1 that  
22 is an actin nucleator, but, as shown here, also functions to enhance IRF3 activation downstream of  
23 RNA sensing by RIG-I/MDA-5. In human and mouse cells lacking Spir-1, IRF3 activation is impaired,  
24 whereas Spir-1 overexpression enhanced IRF3 activation. Furthermore in Spir-1<sup>-/-</sup> cells, the infectious  
25 virus titres and sizes of plaques formed by two viruses that are sensed by RIG-I, vaccinia virus (VACV)  
26 and Zika virus, are increased. These observations demonstrate the biological importance of Spir-1 in  
27 the response to virus infection. Like cellular proteins, viral proteins also have multiple and diverse  
28 functions. Here, we also show that VACV virulence factor K7 binds directly to Spir-1 and that a  
29 diphenylalanine motif of Spir-1 is needed for this interaction and for Spir-1-mediated enhancement of  
30 IRF3 activation. Thus, Spir-1 is a new virus restriction factor and is targeted directly by an  
31 immunomodulatory viral protein that enhances virus virulence and diminishes IRF3 activation.

32

## 33 **Author Summary**

34 Infection of cells by viruses is sensed by host molecules called pattern recognition receptors (PRRs)  
35 that activate signalling pathways leading to an anti-viral response. In turn, viruses express proteins  
36 that negate these host responses to mediate escape from the anti-viral response. Here, we report  
37 that protein K7 from a large DNA virus called vaccinia virus (VACV), binds to a host cell protein called  
38 Spir-1. Spir-1 is known to regulate the assembly of actin filaments inside cells, but here we show that  
39 Spir-1 also functions to activate the host response to virus infection and to limit the replication and  
40 spread of both RNA and DNA viruses. Thus, this study has uncovered new functions of cellular protein  
41 Spir-1 as an activator of innate immunity and as a restriction factor for diverse viruses. Further, it  
42 shows that Spir-1 is targeted by a virus protein during infection.

43

## 44 **Introduction**

45 The host innate immune response to viral infection begins with the sensing of pathogen-associated  
46 molecular patterns (PAMPs) by pattern recognition receptors (PRRs), such as Toll-like receptors and  
47 retinoic acid-inducible gene-I (RIG-I)-like receptors (RLRs) (1, 2). The sensing of virus  
48 macromolecules, such as viral DNA or RNA, by PRRs triggers signalling cascades that culminate in  
49 the activation of the transcriptional factors interferon regulatory factor (IRF) 3, activator protein (AP)  
50 1 and nuclear factor kappa B (NF-κB) (3). These transcriptional factors translocate to the nucleus  
51 where they induce the transcription of genes encoding interferons (IFN), cytokines and chemokines.  
52 Once secreted from the cell, IFNs, cytokines and chemokines promote inflammation to restrict virus  
53 replication and control the infection. IFNs bind to their receptors on the surface of infected or non-  
54 infected cells, and trigger signal transduction via the JAK-STAT pathway leading to expression of  
55 interferon-stimulated genes (ISGs) that induce an antiviral state (4).

56

57 During the co-evolution with their hosts, viruses have evolved strategies to evade, suppress or exploit  
58 the host response to infection by targeting multiple steps of the host immune response (5). Vaccinia  
59 virus (VACV), the prototypical orthopoxvirus, is well known as the live vaccine used to eradicate  
60 smallpox (6). VACV has a large dsDNA genome of approximately 190 kbp (7), replicates in the  
61 cytoplasm (8) and encodes scores of proteins that antagonise innate immunity (9). Interestingly, some  
62 cellular pathways, such as those leading to activation of IRF3 or NF- $\kappa$ B, or the JAK-STAT pathway  
63 downstream of IFNs binding to their receptors, are targeted by multiple different VACV proteins.  
64 Moreover, some of these viral antagonists are multifunctional and inhibit more than one host innate  
65 immune pathway (9).

66

67 VACV protein K7 is one such antagonist of innate immunity. K7 is a small, intracellular protein that is  
68 non-essential for virus replication in cell culture, yet contributes to virulence in both intradermal and  
69 intranasal mouse models of infection (10). Functionally, K7 was reported to suppress NF- $\kappa$ B activation  
70 by binding to interleukin-1 receptor-associated kinase-like 2 (IRAK2) and tumour necrosis factor (TNF)  
71 receptor-associated factor 6 (TRAF6) (11). K7 also inhibits IRF3 activation and binds to the DEAD-  
72 box RNA helicase 3 (DDX3) (11). Another study reported that K7 affected regulation of histone  
73 methylation during VACV infection, by an unknown mechanism (12). Two unbiased proteomic  
74 searches identified cellular binding partners of K7 (13, 14), suggesting that K7 may have additional  
75 functions. The identification of cellular proteins targeted by viral proteins has been a useful approach  
76 to identify cellular factors that function in the recognition and restriction of virus infections (15, 16). In  
77 this study, by investigating the interaction between K7 and the cellular protein Spir-1 (14), we identified  
78 new functions for Spir-1 as an activator of innate immunity and as a restriction factor for both DNA  
79 and RNA viruses.

80

81 The protein spire homolog 1 (Spir-1, also known as SPIRE1) was first described to affect *Drosophila*  
82 embryogenesis (17). Spir-1 has actin-binding domains (18) through which it nucleates actin filaments,  
83 an activity shared with the Arp2/3 complex and the formins (19). Spir-1 is organised in multiple  
84 functional domains. The N-terminal region contains the kinase non-catalytic C-lobe domain (KIND),  
85 which mediates Spir-1 interaction with other proteins, such as the formins (20). Spir-1 and the formins  
86 cooperate during actin nucleation (21-29). The KIND domain is followed by four actin-binding Wiskott-  
87 Andrich syndrome protein homology domain 2 (WH2) domains that are responsible for actin  
88 nucleation (19, 30, 31). The C-terminal region of Spir-1 contains a globular tail domain-binding motif  
89 (GTBM), which is responsible for binding to myosin V (32). Next, there is a Spir-box (SB) domain that  
90 is conserved within the Spir protein family. Due to its similarity to a helical region of the rabphilin-3A  
91 protein that interacts with the GTPase Rab3A, it is thought that the Spir-box domain is involved in the  
92 association of Spir-1 and Rab-GTPases (24, 33-35). Following the SB domain, there is a modified

93 FYVE zinc finger domain that interacts with negatively-charged lipids in membranes. The membrane  
94 targeting specificity is mediated via the interaction of Spir-1 with other membrane-bound proteins such  
95 as the Rab-GTPases (29).

96  
97 In adult mice, Spir-1 is expressed preferentially in neuronal and hematopoietic cells (36, 37) and in  
98 humans the brain also has high Spir-1 expression (38). In general, Spir-1 is involved in several actin-  
99 dependent cellular functions such as vesicle trafficking (24, 34, 35, 39), DNA repair (40), mitochondrial  
100 division (41), and development of germ cells (17, 23, 42) but a role in innate immunity has not been  
101 described. Interestingly, a genome-wide association study found a single nucleotide polymorphism in  
102 Spir-1 that correlated with a different antibody response to smallpox vaccination (43).

103  
104 Here, Spir-1 is shown to promote IRF3 activation and this activity depends upon a diphenylalanine  
105 motif that is also necessary for the direct interaction of Spir-1 with VACV virulence factor K7. Using  
106 gain-of-function and loss-of-function cell lines, Spir-1 is shown to diminish VACV and ZIKV replication  
107 and/or spread and is therefore a viral restriction factor.

108

109

## 110 **Results**

111

### 112 ***Vaccinia virus protein K7 co-precipitates with the C terminal region of Spir-1***

113 A previous proteomic study identified Spir-1 as a cellular interacting partner of VACV protein K7  
114 although this interaction was not validated (14). Mammals have two *Spire* genes, *Spire1* and *Spire2*  
115 that encode closely related proteins (overall 42% identity and 58% similarity in humans), especially  
116 within the WH2 and Spir-box domains (37, 44). The Uniprot database for human Spir-1 (Q08AE8)  
117 describes five Spir-1 isoforms and splicing before the GTBM (Exon 9) and SB (Exon 13) domains has  
118 been demonstrated (45). Among Spir-1 isoforms, Spir-1 known as isoform 2 that doesn't contain Exon  
119 9 or Exon 13, is the most abundant form in the brain and small intestine tissues (45) and is the form  
120 studied here. To confirm if K7 co-precipitates with Spir-1, HEK293T cells were transfected with  
121 plasmids encoding Myc-tagged human Spir-1, Spir-2,  $\beta$ -TrCP, or Myc-GFP, together with plasmids  
122 expressing FLAG-tagged, codon-optimised K7 or another Bcl-2-like VACV protein, A49 (46).  
123 Immunoprecipitation with anti-Myc or anti-FLAG affinity resins showed that K7 was co-precipitated by  
124 Myc-Spir-1 (Fig 1A), but not by Myc-Spir-2, Myc- $\beta$ -TrCP or Myc-GFP. In contrast, A49 interacted with  
125  $\beta$ -TrCP as reported (47), but not with the other proteins. Reciprocally, FLAG-K7 co-precipitated Spir-  
126 1 (Fig 1B), but not the other Myc-tagged proteins, whilst  $\beta$ -TrCP only interacted with A49.

127

128 To investigate if the actin-binding domains of Spir-1 were needed for interaction with K7, two Myc-  
129 tagged truncations of Spir-1 were generated: an N-terminal region (amino acid residues 1-390),  
130 containing the four actin-binding WH2 domains and the KIND domain; and a C-terminal region,  
131 containing the SB and FYVE domains (amino acid residues 391-742, Fig 1C). These truncations,  
132 Spir-1 and Spir-2 were co-expressed with FLAG-K7 and Myc-tagged immunoprecipitation showed  
133 that the C terminus of Spir-1 was sufficient for interaction with K7, whereas the actin-binding domains  
134 were dispensable (Fig 1D, middle panel). The reciprocal IP gave the same conclusion and FLAG-K7  
135 co-precipitated full-length Spir-1 and its C-terminal region (Fig 1D, right panel). As controls, the N-  
136 terminal region co-precipitated endogenous actin via its WH2 domains, and the C-terminal region  
137 interacted with 14-3-3, another binding partner of Spir-1 (48, 49).

138

139 To determine if Spir-1 and K7 interacted at endogenous levels, cells were either mock-infected or  
140 infected with VACV expressing HA-tagged K7 (vHA-K7) (10) or B14 (vHA-B14) (50). HA-  
141 immunoprecipitation confirmed that K7 interacts with endogenous Spir-1, whilst B14 does not (Fig  
142 1E). As reported, K7 also co-precipitated with DDX3 (11), and B14 interacted with IKK $\beta$  (51).  
143 Altogether, these results indicate that Spir-1, but not Spir-2, interacts with K7 via its C-terminal region  
144 and independent of its actin-binding domains.

145

#### 146 ***Ectopic Spir-1 increases IRF3-dependent gene expression***

147 Since the interaction of Spir-1 with K7 is independent of its actin-binding domains, and K7 is a VACV  
148 immunomodulator and virulence factor, we hypothesised that Spir-1 might have an unknown function  
149 in antiviral immunity. To test this, the impact of Spir-1 on innate immune signalling pathways was  
150 assessed by luciferase reporter gene assays. First, cells were transfected with a reporter plasmid in  
151 which the expression of firefly luciferase is driven by the IFN $\beta$  promoter. IFN $\beta$  expression was induced  
152 by Sendai virus (SeV) infection, which is sensed by RIG-I (52). Myc-Spir-1 expression alone did not  
153 affect IFN $\beta$ -dependent gene activation, however, Spir-1 augmented activation induced by SeV  
154 infection (Fig 2A). In contrast, Myc-tagged GFP had no effect, and VACV protein C6 was inhibitory as  
155 described (53). Spir-1 did not affect activation of ISRE-dependent gene expression downstream of  
156 type I IFN, whereas C6, but not N1, was inhibitory (54) (Fig 2B). Similarly, Spir-1 did not affect NF- $\kappa$ B  
157 activation in response to TNF- $\alpha$ , whilst B14 inhibited it (51) and VACV protein N2 had no effect (55)  
158 (Fig 2C). Further analysis using an IRF3-specific reporter plasmid (*ISG56.1* or *IFIT1* promoter)  
159 showed Spir-1 caused a dose-dependent increase in IRF3 activation induced by the CARD domain  
160 of RIG-I (Fig 2D, 2E). As controls, VACV protein N2 inhibited IRF3 activation as described (55) while  
161 A49, an NF- $\kappa$ B inhibitor (47), did not. Unlike Spir-1, Spir-2 did not enhance IRF3 activation whereas  
162 DDX3 did, as described (11) (Fig 2E).

163

164 To map at which stage in the IRF3 pathway Spir-1 was acting, further *ISG56.1* reporter assays were  
165 performed in which the pathway was stimulated by expression of its different components. Spir-1  
166 activated the IRF3 pathway in a dose-response manner when MAVS (mitochondrial antiviral-  
167 signalling protein) was used as stimulant (Fig 2F), but not when downstream components such as  
168 TBK1 (Fig 2G), IKK $\epsilon$  (S1 Fig) or the constitutively active IRF3-5D (Fig 2H) were expressed. These  
169 findings indicate Spir-1 enhances IRF3 activation at or downstream of MAVS and upstream of IKK $\epsilon$   
170 or TBK1. Finally, N- and C-terminal fragments of Spir-1 were tested following stimulation by RIG-I  
171 CARD. Neither half of Spir-1 activated the pathway fully, but the C-terminal region had greater activity  
172 than the N-terminal region (Fig 2I).

173

174 ***Spir-1 interaction with K7 is direct, independent of DDX3, and requires a diphenylalanine motif***

175 K7 interacts directly with DDX3 (56, 57), an adaptor protein in the IRF3 pathway (58, 59). To  
176 investigate whether K7 binding to Spir-1 was via DDX3, cells stably expressing an inducible shRNA  
177 targeting DDX3 (shDDX3) (59) were used. Knockdown, rather than knockout, of DDX3 was utilised  
178 because *DDX3* encodes an essential protein (60). Cells expressing a non-silencing control (NSC)  
179 shRNA were used in parallel. DDX3 knockdown was induced by incubation with doxycycline (DOX)  
180 for 48 h as described (59), prior to transfection with either FLAG-tagged K7 or A49 for 24 h. Viral  
181 proteins were immunoprecipitated via their FLAG tag, followed by immunoblotting for endogenous  
182 Spir-1. DDX3 levels were reduced greatly in shDDX3 cells following DOX treatment, but not in control  
183 cells (Fig 3A). Despite this, Spir-1 co-precipitation by K7 was unaffected (Fig 3A). A49 did not co-  
184 precipitate either DDX3 or Spir-1 (Fig 3A). Next, the shDDX3 cells were used to determine if DDX3  
185 contributed to Spir-1-induced IRF3 activation. After DDX3 knockdown, there was no significant  
186 difference in IRF3 stimulation by Spir-1 (Fig 3B). Notably, K7 inhibited IRF3 activation when DDX3  
187 was knocked down, showing K7 had another IRF3 inhibitory mechanism independent of DDX3 (Fig  
188 3B). Moreover, the presence of K7 reversed the activation of the pathway by Spir-1 (Fig 3B). In  
189 summary, Spir-1 interaction with K7 and its function in the IRF3 pathway are independent of DDX3.

190

191 Since both DDX3 and Spir-1 bind to K7 and activate IRF3, their amino acid sequences were  
192 compared. The structure of K7 bound to a DDX3 peptide and subsequent structure-based  
193 mutagenesis showed that a diphenylalanine (FF) motif in DDX3 is essential for binding K7 and for  
194 IRF3 activation (57). An alignment of the C terminus of Spir-1 and the minimal ten-amino acid peptide  
195 from DDX3 (residues 81-90) needed for binding K7, showed a similar FF motif in Spir-1 (Fig 3C). To  
196 determine if this was important for Spir-1 binding to K7, the phenylalanines were mutated to alanines  
197 (FFAA) and the mutant was expressed in cells together with FLAG-tagged K7. Wild-type (WT) Myc-  
198 Spir-1 and Myc-GFP were also expressed. Anti-Myc or anti-FLAG immunoprecipitation showed that  
199 the FFAA mutation impaired Spir-1 interaction with K7 (Fig 3D), although it still precipitated both actin

200 and 14-3-3, indicating normal folding. Notably, the FFAA mutant no longer activated IRF3 (Fig 3E).

201

202 To determine if the K7 interaction with Spir-1 was direct, these proteins were expressed by *in vitro*  
203 transcription and translation and immunoprecipitated alongside Myc-tagged TAB2 and FLAG-tagged  
204 VACV protein F12 (61) as controls. Both Spir-1 and DDX3 interacted directly with K7, whereas Spir-  
205 1 did not interact with F12, and K7 did not interact with TAB2 (Fig 3F, 3G). Taken together, this  
206 demonstrated that Spir-1 binds directly to K7 and shares with DDX3 a conserved diphenylalanine  
207 motif, which is required for its function in the IRF3 pathway.

208

### 209 ***K7 uses the same amino acid residues to target both Spir-1 and DDX3***

210 K7 binds to the DDX3 peptide through a hydrophobic pocket within a negatively-charged face (56,  
211 57). Thus, interactions between K7 and the DDX3 peptide involve hydrophobic contacts, hydrogen  
212 bonds and electrostatic interactions, of which electrostatic contacts between R88 of DDX3 with both  
213 D28 and D31 of K7 are notable. D31 also forms a hydrogen bond with DDX3 S83 (57). Using this  
214 information, K7 mutants were generated in an attempt to distinguish between K7 binding to Spir-1  
215 and DDX3. K7 D28 and D31 were changed singly or together to alanine (D28A, D31A) and expressed  
216 alongside WT K7 or GFP, and together with Myc-tagged Spir-1 and HA-tagged DDX3.  
217 Immunoprecipitation showed that K7 D28A still bound both Spir-1 and DDX3, whilst K7 D31A had  
218 impaired binding to both proteins, especially DDX3 (Fig 4A). Furthermore, the double mutant (DDAA)  
219 had further reduced binding to Spir-1 and no detectable binding to DDX3 (Fig 4A). Importantly, all  
220 mutants still interacted with COP $\epsilon$  (Fig 4A), another K7 binding partner (13), suggesting normal K7  
221 folding. Co-precipitation of endogenous Spir-1 with FLAG-tagged K7 and mutants gave similar  
222 conclusions (Fig 4B). Notably, the K7 D31A mutant inhibited IRF3 activation poorly compared to the  
223 WT or D28A (Fig 4C). Altogether, these data indicate that K7 requires D31 for interacting with both  
224 DDX3 and Spir-1 and via each interaction it inhibits the IRF3 pathway.

225

### 226 ***IRF3 activation is reduced in the absence of Spir-1***

227 To investigate Spir-1-mediated activation of IRF3 further, Spir-1 knockout (KO) HEK293T cell lines  
228 were generated by CRISPR-Cas9-mediated targeting of *SPIRE1* exon 3, which is conserved in all  
229 Spir-1 isoforms (Fig 5A). After single cell selection, HEK293T cell lines were confirmed to lack Spir-1  
230 by immunoblotting (Fig 5B) and by sequencing of both *Spire-1* alleles (Fig 5A). A clone that lacked  
231 Spir-1 protein expression and in which the *Spire-1* open reading frame was disrupted by frameshift  
232 mutations in both alleles, and that lacked WT sequence, was selected. Additionally, a vector  
233 expressing Myc-tagged Spir-1 was used to rescue Spir-1 expression in the KO cell line following  
234 lentiviral transduction. In parallel, both WT and KO cells were transduced with a control empty vector  
235 (EV) lentivirus. Spir-1 WT cells transduced with EV, and Spir-1 KO cells transduced with EV or Myc-  
236 Spir-1 were infected with SeV to activate the IRF3 pathway. Supernatants were collected for ELISA

237 and cells lysates were used for either RNA extraction or immunoblotting, which confirmed that cells  
238 did or did not express Spir-1 (Fig 5B). The expression of Myc-Spir-1 increased in the presence of  
239 SeV, but this was not observed for endogenous Spir-1 (Fig 5B). One possible explanation is that Myc-  
240 Spir-1 expression is driven by the human cytomegalovirus immediate early promoter (62) that  
241 contains binding sites for transcription factors such as NF- $\kappa$ B (63), which can also be activated during  
242 SeV infection. The phosphorylation of IRF3 at S396 (p-IRF3), a hallmark of IRF3 activation (64),  
243 increased greatly 24 h after SeV infection of WT cells (Fig 5B) but was reduced in the absence of  
244 Spir-1 and restored in the KO cells expressing Myc-Spir-1 (Fig 5B). Moreover, after SEV infection,  
245 Spir-1 KO cells produced lower levels of mRNAs for *ISG56/IFIT1* (Fig 5C), *IFNB1* (Fig 5D) and  
246 *CXCL10* (Fig 5E), and secreted less CXCL-10 (Fig 5F), as measured by RT-qPCR and ELISA,  
247 respectively. Importantly, the absence of Spir-1 did not change the levels of CXCL-10 secreted in  
248 response to TNF- $\alpha$ , a specific agonist of the NF- $\kappa$ B pathway (Fig 5G).

249  
250 Immortalised mouse embryonic fibroblasts (MEFs) from mice with a terminator (gene trap) between  
251 exons 3 and 4 of the *Spire1* gene (65) were used to investigate the contribution of Spir-1 to IRF3  
252 activation in cells from a different mammal. After stimulation of IRF3 by either poly I:C or SeV infection,  
253 MEFs were lysed for immunoblotting or RNA analysis and supernatants were collected for ELISA. A  
254 reduction in p-IRF3 was seen in Spir-1 KO cells (Fig 6A, 6B) and this was quantified (bottom graphs  
255 in Fig 6A, 6B). The Spir-1 KO MEFs also expressed less mRNAs for cytokines and chemokines upon  
256 stimulation with poly I:C or SeV infection than their WT controls (Fig 6C, 6D, 6E, 6F, 6G, 6H). Likewise,  
257 CXCL-10 and IL-6 secretion were lower from Spir-1 KO cells (Fig 6I, 6J, 6K, 6L). However, the levels  
258 of CXCL-10 and IL-6 secreted after stimulation with IL-1 $\beta$  were not reduced in Spir-1 KO MEFs (Fig  
259 6M, 6N); indeed, there was a small increase in IL-6 levels in KO cells (Fig 6N). In summary, in both  
260 mouse and human cells lacking Spir-1 there is a defect in IRF3 activation downstream of RIG-I/MDA5,  
261 whilst other immune signalling pathways were largely unaltered.

262

### 263 ***Spir-1 is a viral restriction factor***

264 Given that Spir-1 interacts with VACV protein K7 and enhances IRF3 activation, which is critical for  
265 the host response to viral infection, the impact of Spir-1 on VACV replication and spread was  
266 assessed. Spir-1 WT and KO HEK293T cells and the derivative cell line in which Spir-1 expression  
267 was restored in the KO cells, were infected with A5-GFP-VACV, a VACV strain expressing GFP fused  
268 to capsid protein A5 (66), and 2 days (d) later plaque diameters were measured (Fig 7A, 7B). A  
269 significant increase in plaque size was seen in the absence of Spir-1 compared to both WT and  
270 rescued cells (Fig 7B), suggesting that Spir-1 restricts VACV spread and/or replication. Lastly, virus  
271 growth on those cells was assessed. Cells were infected with 0.001 plaque-forming unit (PFU)/cell of  
272 VACV strain WR and 2 d later the virus yield was determined by plaque assay. Spir-1 KO cells yielded



273 higher viral titres compared to both WT and Spir-1-complemented cells (Fig 7C).

274

275 The IRF3 pathway also restrict RNA viruses, therefore the impact of Spir-1 in restricting Zika virus  
276 (ZIKV), a single-stranded RNA virus, was also assessed. HEK293T Spir-1 WT, KO and Spir-1-  
277 rescued cells were infected with ZIKV-mCherry with 0.01 PFU/cell. Three days later, the mCherry  
278 signal was visualised by live-cell imaging and showed a greater signal in the KO cells compared to  
279 controls (Fig 7D), suggesting an increased ZIKV replication in these cells. To address that possibility,  
280 the virus yield in the supernatant of infected HEK293T cells was determined by plaque assay in VERO  
281 E6 cells (Fig 7E). In the absence of Spir-1, there is an increase in ZIKV titres compared to the WT  
282 and Spir-1 restored KO cells. Collectively, loss of Spir-1 caused an increase in both virus plaque size  
283 and yield of infectious virus, showing that Spir-1 functions as a restriction factor against both a DNA  
284 (VACV) and an RNA (ZIKV) virus.

285

286

## 287 **Discussion**

288

289 During co-evolution with their hosts, viruses have evolved mechanisms to evade the host antiviral  
290 responses and thereby replicate and spread efficiently. Such virus proteins are numerous and have  
291 diverse functions and, therefore, can be used to gain insight into how the host innate immune system  
292 functions. VACV is a poxvirus and encodes scores of immunomodulatory proteins many of which  
293 target the innate immune system. In several cases, multiple VACV proteins engage the same  
294 pathway, but despite this, these proteins each contributes to virulence indicating non-redundant  
295 functions (9). Sometimes a single protein can inhibit multiple pathways (9) or an open reading frame  
296 can encode multiple proteins with different functions (67). High-throughput proteomic approaches  
297 have been used to identify binding partners of VACV proteins, or cellular proteins that are up or down-  
298 regulated during virus infection, and such cellular proteins may have antiviral activity and function in  
299 innate immunity (14, 16). For example, histone deacetylases (HDAC) 4 and 5 are each targeted for  
300 proteasomal degradation by VACV protein C6 and function as a virus restriction factor (15, 16).

301

302 Here, Spir-1 is characterised as a new cellular protein that is bound by VACV protein K7 (Fig 1), a  
303 virulence factor that inhibits NF- $\kappa$ B and IRF3 activation (10, 11). K7 binding to Spir-1 was identified in  
304 a proteomic screen for binding partners of virus immunomodulatory proteins (14). Here, this  
305 interaction is confirmed, demonstrated to occur at endogenous levels during VACV infection (Fig 1E),  
306 and shown to be direct (Fig 3F, 3G).

307

308 Spir-1 belongs to a family of proteins involved in actin organisation (44) but K7 interaction with Spir-1

309 does not require its N-terminal actin-binding domain (Fig 1D). VACV induces polymerisation of actin  
310 to facilitate virus dissemination from the cell surface and VACV mutants unable to polymerise actin  
311 spread poorly and form small plaques (68). However, a mutant lacking K7 produces normal size  
312 plaques (10). Given that K7 is an immunomodulatory protein, we hypothesised that Spir-1 might have  
313 a function in innate immunity. In reporter gene assays, Spir-1 over-expression enhanced IRF3-  
314 dependent gene expression (Fig 2D) but did not affect JAK-STAT signalling induced by type I IFN, or  
315 NF- $\kappa$ B activation (Fig 2B, 2C). Conversely, human and murine Spir-1 knockout cell lines showed  
316 diminished IRF3 signalling, with reduced IRF3 phosphorylation and reduced transcription and  
317 expression of IRF3-responsive genes (Fig 5B, 6A, 6B). Importantly, rescue of Spir-1 expression in  
318 Spir-1 KO cells restored phospho-IRF3 and cytokine expression levels (Fig 5).

319

320 To map where Spir-1 influences IRF3 activation, the pathway was activated by different agonists and  
321 the influence of Spir-1 examined. Spir-1 enhanced activation induced by SeV infection (Fig 2A, 5 and  
322 6), poly I:C transfection (Fig 6), and overexpression of both RIG-I CARD (Fig 2D, 2E) and MAVS (Fig  
323 2F), but not overexpression of TBK1, IKK $\epsilon$  or a constitutively active IRF3 (Fig 2G and S1). SeV RNA  
324 is sensed by RIG-I (69) whilst high molecular weight (HMW) poly I:C is sensed by MDA-5 (52, 70).  
325 This suggests Spir-1 acts at or downstream of MAVS, the adaptor molecule recruited downstream of  
326 RIG-I and MDA5 activation (71). The association of RIG-I/MDA5 with MAVS results in the recruitment  
327 of tumour necrosis factor receptor-associated factors (TRAF), such as TRAF3, leading to the  
328 phosphorylation of IRF3 by TBK1/IKK $\epsilon$ . Collectively, these data suggest Spir-1 functions at MAVS or  
329 TRAF3 level.

330

331 K7 inhibition of IRF3 activation was attributed to direct binding to DDX3, which acts as a  
332 multifunctional scaffolding adaptor culminating in IRF3 activation (58, 59). However, data presented  
333 here show K7 has additional targets within the IRF3 pathway, since Spir-1 also contributes to IRF3  
334 activation and K7 is able to inhibit IRF3 activation even in the absence of DDX3. Furthermore, DDX3  
335 and Spir-1 act at different positions in the pathway; DDX3 acts at the TRAF3 and TBK1/IKK $\epsilon$  level (9,  
336 11, 59, 72), whilst Spir-1 acts upstream of TBK1/IKK $\epsilon$  (Fig 2). Interestingly, both DDX3 and Spir-1  
337 share a diphenylalanine motif that is responsible for both binding to K7 and their function in the IRF3  
338 pathway (Fig 3) (57). Furthermore, the same amino acid residue in K7 (D31) is crucial for its binding  
339 to both cellular proteins (Fig 4). This prevented assessment of the relative importance of K7 binding  
340 to each cellular protein.

341

342 Nonetheless, Spir-1 has an important antiviral role because cells lacking Spir-1 show enhanced VACV  
343 and ZIKV replication and/or spread (Fig 7). Comparable data for DDX3 are lacking, and obtaining  
344 such data is complicated by DDX3 being an essential protein (60). Both K7 and Spir-1 localise in the

345 cytoplasm (10, 34). Interestingly, mutations in the FYVE domain and in the diphenylalanine motif in  
346 Spir-1 change its sub-cellular localisation from a trans-Golgi network and post-Golgi vesicles  
347 localisation to an even cytoplasmic distribution (29, 34). Neither the N- or C-terminal halves of Spir-1  
348 were capable of activating the IRF3 pathway as well as full-length protein (Fig 2I), despite comparable  
349 expression levels, suggesting that both halves are important. It is possible that Spir-1 is directed to  
350 the correct location by its C-terminal domain, whilst its N-terminal domain mediates Spir-1 engagement  
351 with other proteins to promote IRF3 activation. This might explain why the FFAA Spir-1 mutant is no  
352 longer able to activate the IRF3 pathway. Another possibility is that K7 may bind to the Spir-1  
353 diphenylalanine motif and displace other proteins or sequester it and prevent it reaching its subcellular  
354 location. Spir-1 has several isoforms (45), and one, Spire-1C (also known as Spire1-E13), differs from  
355 the canonical isoform by encoding an extra exon sequence (ExonC or E13), which mediates its  
356 mitochondrial localisation and regulates mitochondrial division (41). Even though this was not the  
357 isoform used in the present study, K7 might regulate Spir-1 trafficking to the mitochondrion, where  
358 MAVS is anchored (73).

359  
360 RIG-I and MDA5 can sense RNA virus genomes directly, but also RNA generated by infection with  
361 DNA viruses (74), leading to IRF3 activation. Therefore, RIG-I/MDA5-triggered antiviral response is  
362 antagonised by several RNA and DNA viruses (71, 75). For instance, ZIKV has been shown to be  
363 sensed by both RIG-I and MDA-5 depending on the infected cell type (reviewed by (76)). Furthermore,  
364 it has long been known that dsRNA is generated during VACV infection (77-79), so it is not surprising  
365 that VACV encodes proteins to interfere with cytosolic RNA sensing. For instance, VACV protein E3  
366 binds to dsRNA and prevents RIG-I-dependent sensing of RNA products generated via the  
367 transcription of AT-rich DNA by RNA polymerase III (80, 81), and the decapping enzymes D9 and  
368 D10 prevent the accumulation of dsRNA from viral complementary RNA molecules (82). Downstream  
369 of RNA sensing, VACV encodes proteins to inhibit IRF3 activation, such as C6, which acts at  
370 TBK1/IKK $\epsilon$  activation level (53), N2, which acts downstream of IRF3 translocation to the nucleus (55)  
371 and K7, which targets DDX3 (11). Here, we show that Spir-1 also contributes to IRF3 activation, with  
372 both Spir-1 and DDX3 sharing a similar motif which binds K7.

373  
374 In summary, Spir-1 is a new cellular protein that affects IRF3 activation and is a virus restriction factor.  
375 By exploring in detail the function of VACV protein K7, an additional cellular factor that regulates IRF3  
376 activation and acts as a viral restriction factor has been characterised.

377  
378  
379

## 380 **Material and Methods**

381

### 382 *Cells lines*

383 Human embryonic kidney (HEK) 293T, HEK293T NSC or shDDX3 (kind gifts from Dr. Martina  
384 Schröder, Maynooth University, Ireland), murine embryonic fibroblasts (MEFs) Spir-1 KO and WT  
385 (kindly provided by Prof. Dr. Eugen Kerkhoff - University Hospital Regensburg, Germany), BSC-1 and  
386 VERO E6 (African Green Monkey) cells were cultured in Dulbecco's modified Eagle's medium  
387 (DMEM, Gibco) supplemented with 10% heat-treated (56 °C, 1 h) foetal bovine serum (FBS, Pan  
388 Biotech), 100 U/mL penicillin and 100 µg/mL streptomycin (P/S, Gibco). RK13 cells were grown in  
389 minimal essential medium (MEM, Gibco) supplemented with 10% FBS and P/S.

390

### 391 *Viruses*

392 VACV strain Western Reserve (WR) and derivative strains expressing GFP fused to the capsid protein  
393 A5 (A5-GFP-VACV) (66), VACV expressing HA-tagged B14 (50) and VACV expressing HA-tagged  
394 K7 (10) were described. VACV strains were grown on RK13 cells and titrated by plaque assay on  
395 BSC-1 cells. Sendai virus (SeV) Cantell strain (Licence No. ITIMP17.0612A) was a gift from Prof.  
396 Steve Goodbourn (St George's Hospital Medical School, University of London). ZIKV engineered to  
397 express a mCherry marker (83) was a kind gift from Dr. Trevor Sweeney (Department of Pathology,  
398 University of Cambridge).

399

### 400 *Plasmids*

401 A plasmid encoding the Myc-tagged human Spir-1 isoform 2 and human Spir-2 (20) constructs were  
402 a kind gift of Prof. Dr. Eugen Kerkhoff. Spir-1 N- and C-terminal truncations were constructed by PCR  
403 amplification from pcDNA3.1-Myc-Spir-1 and inserted into plasmid pcDNA3.1-Myc. Codon-optimised  
404 FLAG-K7 was described (84) and Spir-1 and K7 plasmids were used as templates for site-directed  
405 mutagenesis according to the instructions of the QuikChange Site-Directed Mutagenesis Kit (Agilent).  
406 All mutations were confirmed by DNA sequencing. Myc-DDX3 and HA-DDX3 (11) were kindly  
407 provided by Dr. Martina Schröder. The IFN $\beta$ -firefly luciferase reporter plasmid was from T. Taniguchi  
408 (University of Tokyo, Japan), NF- $\kappa$ B-firefly luciferase was from R. Hofmeister (University of  
409 Regensburg, Germany) and ISG56.1-firefly luciferase was a gift from Ganes Sen (Cleveland Clinic,  
410 USA). ISRE-firefly luciferase and pTK-renilla luciferase (pRL-TK) plasmids were from Promega.  
411 Vectors expressing MAVS, IKK $\epsilon$ , TBK1 and IRF3-5D (53), and RIG-I-CARD domain (85) were  
412 described. Lentivirus vector plasmid pLKO.DCMV.TetO.mcs (pLDT) (86) was a gift from Prof. Roger  
413 Everett (University of Glasgow, UK) and was used as backbone for sub-cloning the Myc-Spir-1.  
414 Plasmids pCMV.dR8.91 (expressing all necessary lentivirus helper functions) and pMD-G (expressing  
415 the vesicular stomatitis virus envelope protein G) were from Dr. Heike Laman (University of

416 Cambridge, UK). pF3A WG plasmid was from Promega. px459 CRISPR-Cas9 plasmid was  
417 purchased from Addgene. More information about plasmids and oligonucleotide primers used are  
418 given in the reagents table.

419

#### 420 *Antibodies and Reagents*

421 Primary antibodies used were from the following sources: rabbit (Rb) anti-Myc (Cell Signaling, 2278),  
422 mouse (Ms) anti-Myc (Cell Signaling, 9B11), Rb anti-Actin (Sigma, A2066), Ms anti-FLAG (Sigma  
423 F1804), Rb anti-14-3-3 (Santa Cruz, sc-629), Ms anti -Spir-1 (Santa Cruz, sc-517039), Ms anti- Spir-  
424 1 (Abcam, ab57463), Rb anti-DDX3 (Cell Signaling, 2635), Rb anti-IKK $\beta$  (Cell Signaling, 2684), Rb  
425 anti-HA (Sigma, H6908), Ms anti- $\alpha$ -Tubulin (Millipore, 05-829), Ms anti-GAPDH (Sigma, G8795), Rb  
426 anti-IRF3 (Cell Signaling, 4962), Ms anti-COP $\epsilon$  (Santa Cruz, sc-133194), Rb anti-phospho-IRF3  
427 Ser396 (Cell Signaling, 4947S) and Rb polyclonal anti-C6 (53). For dilutions used for the primary  
428 antibodies, see reagents table. Secondary antibodies used (1:10,000 dilution) were IRDye 680RD-  
429 conjugated goat anti-rabbit IgG or anti-mouse IgG and IRDye 800CW-conjugated goat anti-rabbit IgG  
430 or anti-mouse IgG (LI-COR).

431

432 Reagents used in this study were: Anti-c-Myc Agarose from Santa Cruz Biotechnology, and  
433 monoclonal Anti-HA-Agarose, clone HA-7, ANTI-FLAG M2 Affinity Gel and Poly-D-lysine  
434 hydrobromide (all from Sigma Aldrich). Human IFN $\alpha$ , human TNF- $\alpha$  and mouse IL-1 $\beta$  were from  
435 Peprotech, HMW poly(I:C) and puromycin were from InvivoGen, and doxycycline was from Melford.

436

#### 437 *Reporter Gene Assay*

438 HEK293T cells were seeded in 96-well plates with  $1.5 \times 10^4$  cells per well. After two days, cells were  
439 transfected with 60 ng per well of the firefly luciferase reporter plasmids (IFN $\beta$ , ISRE, NF- $\kappa$ B or  
440 ISG56.1), 10 ng per well of pTK-renilla luciferase and different amounts of the expression plasmid  
441 under test or empty vector (EV) control using polyethylenimine (PEI, CellnTec, 2  $\mu$ L per 1  $\mu$ g DNA).  
442 When necessary, EV plasmid was added to the transfection so that the final amount of DNA  
443 transfected was kept constant. In cases where stimulation was done by transfecting another plasmid,  
444 the same amount of EV was transfected to the non-stimulated (NS) control wells. Cells were  
445 stimulated as shown in the Figures: (i) infection with SeV for 24 h (IFN $\beta$  Luc), (ii) 10 ng/mL of TNF- $\alpha$   
446 for 8 h (NF- $\kappa$ B Luc) or (iii) with 1000 U/mL of IFN $\alpha$  for 8 h (ISRE-Luc). After stimulation, cells were  
447 washed with PBS, lysed with 100  $\mu$ L/well of passive lysis buffer (Promega) and firefly and renilla  
448 luciferase activities were measured using a FLUOstar luminometer (BMG). The firefly luciferase  
449 activity in each sample was normalised to the renilla luciferase activity and fold inductions were  
450 calculated relative to the non-stimulated controls for each plasmid. In all cases, data shown are  
451 representative from at least three independent experiments with at least triplicate samples analysed

452 for each condition.

453

#### 454 *Immunoblotting*

455 HEK293T ( $8 \times 10^5$ ) or MEFs ( $2 \times 10^5$ ) cells were seeded in 6-well plates and 24 h later cells were  
456 stimulated by infection with SeV or transfection with 5  $\mu\text{g}/\text{mL}$  of poly I:C using lipofectamine 2000 (Life  
457 Technologies). After stimulation, cells were washed twice with ice-cold PBS, and scrapped into a cell  
458 lysis buffer containing 50 mM Tris-HCl pH 8, 150 mM NaCl, 1 mM EDTA, 10% (v/v) glycerol, 1% (v/v)  
459 Triton X-100 and 0.05% (v/v) NP-40, supplemented with protease (cOmplete Mini, Roche) and  
460 phosphatase inhibitors (PhosSTOP, Roche). Protein concentration was determined using a  
461 bicinchoninic acid protein assay kit (Pierce) before being boiled at 100 °C for 5 min. Proteins were  
462 then separated by SDS-polyacrylamide gel electrophoresis and transferred onto a nitrocellulose  
463 Amersham Protran membrane (GE Healthcare). Membranes were blocked at room temperature with  
464 either 5% (w/v) milk or 5% (w/v) bovine serum albumin (BSA, Sigma) in PBS containing 0.1% Tween  
465 20. Then, membranes were incubated with a specific primary antibody diluted in blocking buffer at 4  
466 °C overnight. After washing, membranes were probed with LI-COR secondary antibodies at room  
467 temperature followed by imaging using the LI-COR Odyssey imaging system, according to the  
468 manufacturer's instructions. Where indicated, protein bands from at least two independent  
469 experiments were quantified by using Odyssey software (LI-COR Biosciences).

470

#### 471 *Immunoprecipitation*

472 HEK293T cells were seeded in 10-cm dishes ( $3.5 \times 10^6$  cells per dish) and transfected with the  
473 plasmids indicated in the Figures using PEI. The following day, cells were washed twice with PSB,  
474 lysed in immunoprecipitation (IP) lysis buffer (150 mM NaCl, 50 mM Tris-HCl pH 7.4, 0.5% (v/v)  
475 Nonidet P-40 (NP-40) and protease (cOmplete Mini, Roche) and phosphatase inhibitors (PhosSTOP,  
476 Roche)) and cleared by centrifugation at 21,000  $g$  for 15 min at 4 °C. Cleared lysates were then  
477 incubated with 20  $\mu\text{L}$  of ANTI-FLAG M2 Affinity Gel (Sigma Aldrich) or Anti-HA Agarose (Sigma  
478 Aldrich) for 2 h, or with 50  $\mu\text{L}$  of Anti-c-Myc Agarose overnight, at 4 °C. Alternatively, proteins were  
479 expressed by *in vitro* transcription/translation using the TNT SP6 High-Yield Wheat Germ Protein  
480 Expression System (Promega) prior to incubation with the affinity resins. Immunoprecipitations were  
481 washed 3 or 4 times in IP buffer and bound proteins were eluted in Laemmli SDS-PAGE loading buffer  
482 and heated at 100 °C for 5 min. Samples were then analysed by SDS-PAGE and immunoblotting.

483

#### 484 *RT-qPCR*

485 HEK293T ( $4 \times 10^5$ ) or MEFs ( $1 \times 10^5$ ) cells were seeded in 12-well plates. The next day, cells were  
486 stimulated by infection with SeV or transfection with 5  $\mu\text{g}/\text{mL}$  of poly I:C using lipofectamine 2000 (Life  
487 Technologies). RNA was extracted using the RNeasy kit (QIAGEN) and 500 ng of each RNA sample  
488 was used to synthesise cDNA using Superscript III reverse transcriptase according to the

489 manufacturer's protocol (Invitrogen). mRNA was quantified by real-time PCR using a ViiA 7 Real-  
490 Time PCR System (Life Technologies), fast SYBR Green Master Mix (Applied Biosystems) and the  
491 following primers: human *CXCL10* (Fwd: GTGGCATTCAAGGAGTACCTC, Rev:  
492 GCCTTCGATTCTGGATTCAGA), human *IFNB1* (Fwd:ACATCCCTGAGGAGATTAAGCA, Rev:  
493 GCCAGGAGGTTCTCAACAATAG), human *IFIT1* (Fwd: CCTGAAAGGCCAGAATGAGG, Rev:  
494 TCCACCTTGTCCAGGTAAGT), human *GAPDH* (Fwd: ACCCAGAAGACTGTGGATGG, Rev:  
495 TTCTAGACGGCAGGTCAGGT), mouse *Ifit1* (Fwd: ACCATGGGAGAGAATGCTGAT, Rev:  
496 GCCAGGAGGTTGTGC), mouse *Il6* (Fwd: GTAGCTATGGTACTCCAGAAGAC. Rev:  
497 ACGATGATGCACTTGCAGAA), mouse *Cxcl10* (Fwd: ACTGCATCCATATCGATGAC, Rev:  
498 TTCATCGTGGCAATGATCTC) and mouse *Gapdh* (Fwd: ATGGTGAAGGTCGGTGTGAACGG, Rev:  
499 TTACTIONCCTTGGAGGCCATGTAGGC). Gene amplification was normalised to *GAPDH*  
500 (glyceraldehyde-3-phosphate dehydrogenase) amplification from the same sample, and the fold  
501 induction of genes in stimulated samples was calculated relative to the unstimulated control.  
502 Experiments were performed in at least biological duplicate and conducted at least twice.

503

#### 504 *ELISA*

505 HEK293T ( $4 \times 10^5$ ) or MEFs ( $1 \times 10^5$ ) cells were seeded in 12-well plates. The following day, cells  
506 were stimulated by: (i) infection with SeV; (ii) transfection with 5  $\mu\text{g}/\text{mL}$  of poly I:C using lipofectamine  
507 2000 (Life Technologies), (iii) 50 ng/mL of human TNF- $\alpha$  or (iv) 50 ng/mL of mouse IL-1 $\beta$ . After  
508 stimulation, supernatants were assayed for human or murine CXCL-10 and IL-6 protein using Duoset  
509 enzyme-linked immunosorbent assay (ELISA) reagents (R&D Biosystems) according to the  
510 manufacturer's instructions.

511

#### 512 *CRISPR/Cas9-mediated genome editing*

513 Two guide RNAs (gRNAs) were designed using online software (<http://tools.genome-engineering.org>)  
514 to target *SPIRE1* gene exon 3, which is shared by all Spir-1 isoforms. CRISPR/Cas9-mediated  
515 genome editing of HEK293T cells was performed as described (87). Briefly, px459 CRISPR/Cas9  
516 plasmids with or without gRNA sequence were transfected into HEK293T using TransIT-LT1  
517 transfection reagent (Mirus, MIR 2306). Puromycin (1  $\mu\text{g}/\text{mL}$ ) was added to transfected cells and,  
518 after 48 h, puromycin-resistant cells were serially diluted to obtain individual clones. Several clones  
519 were amplified, and a few potential knockout clones were selected by immunoblotting and confirmed  
520 by genomic DNA sequencing at the gRNA target sites. Only one gRNA was successful and one clonal  
521 cell line was confirmed to be knockout after PCR-amplified genomic DNA was cloned into bacterial  
522 plasmids and multiple colonies ( $n = 20$ ) were sequenced. These all contained frameshift mutations.  
523 No wild type allele was identified.

524

#### 525 *Lentivirus transductions*

526 Lentivirus particles for transduction were generated after transient co-transfection of HEK293T cells  
527 seeded in 6-cm dishes. Cells were transfected with pCMV.dR8.91 and pMD-G vectors together with  
528 either pLDT-EV or pLDT-Myc-Spir-1. After 48 h and 72 h, the supernatant was collected and passed  
529 through a 0.45 µm filter. Lentivirus-containing supernatant was then used to infect HEK293T Spir-1  
530 WT and KO cells. Transduced cells were selected with 1 µg/mL puromycin followed by clonal selection  
531 by serial dilution. Spir-1 expression was assessed by immunoblotting.

532

### 533 *Virus Infection*

534 Plaque size analysis were performed in HEK293T Spir-1 WT and KO cells seeded in 6-well plates  
535 coated with poly-D-lysine (Sigma). Once confluent, cells were infected with VACV-A5-GFP at 20 PFU  
536 per well for 2 d. Virus plaques diameters ( $n=54$ ) were measured using AxioVision 4.8 software and a  
537 ZEISS Axio Vert.A1 fluorescent microscope.

538

539 Viral replication was measured by multi-step growth analyses of HEK293T Spir-1 WT and KO cells  
540 infected with VACV-WR at 0.001 PFU / cell or ZIKV-mCherry at 0.01 PFU/cell. For VACV, at 48 h  
541 post infection, cells were scraped in their medium and collected by centrifugation at 500 *g* for 5 min.  
542 Cells were subjected to three rounds of freeze-thawing before the infectious viral titre was determined  
543 by plaque assay on BSC-1 cells for 3 days. For ZIKV, at 72 h post infection, supernatants of infected  
544 cells were collected, and virus infectivity was determined by plaque assay on Vero E6 cells for 5 days.  
545 ZIKV-infected monolayers were also imaged using a Zeiss Axiovert 200M microscope. Images in  
546 Figure 7D were processed using Adobe Photoshop 2020 to enhance linearly the mCherry  
547 visualisation. SC-1 and VERO E6 cells were then fixed with 4% paraformaldehyde (PFA) and stained  
548 with toluidine blue.

549

### 550 *Statistical Analysis*

551 Statistical analysis was carried out using one or two-way ANOVA test where appropriate with the  
552 Bonferroni post-test, using the GraphPad Prism statistical software (Graph-Pad Software). Statistical  
553 significance is expressed as follows: ns = not significant, \* $P < 0.05$ , \*\* $P < 0.01$ , \*\*\* $P < 0.001$ , \*\*\*\* $P <$   
554  $0.0001$ .

555

556

## 557 **Acknowledgements**

558

559 We thank Dr. Martina Schröder, (Maynooth University, Ireland) and Prof. Dr. Eugen Kerkhoff  
560 (University Hospital Regensburg, Germany) for providing cells lines and plasmids for this study. We  
561 also thank Callum Talbot-Cooper for critical reading of the manuscript.



562

## 563 **Conflicts of Interest**

564

565 The authors declare that they have no conflict of interest.

566

567

## 568 **Figure Legends**

569

570 **Fig 1: Spir-1 co-immunoprecipitates VACV protein K7 via its C-terminal region.** HEK293T cells  
571 were transfected (**A**, **B** and **D**) with Myc-tagged and FLAG-tagged plasmids overnight. Cell lysates  
572 were immunoprecipitated using either Myc (**A** and **D** – right panel) or FLAG affinity resins (**B** and **D** –  
573 middle panel) and analysed by SDS-PAGE and immunoblotting. (**C**) Schematic representations of  
574 hSpir-1 isoform 2 full-length (top) and its C- and N-terminal truncations. (**E**) HEK293T cells were either  
575 mock-infected or infected at 5 or 10 PFU/cell with vHA-K7 or vHA-B14 for 4 h. Lysates were  
576 immunoprecipitated using HA-affinity resin and analysed by SDS-PAGE and immunoblotting. In (**A**),  
577 (**B**), (**D**) and (**E**) the positions of molecular mass markers in kDa are shown on the left. Each  
578 experiment was done 3 times and representative results are shown.

579

580 **Fig 2: Ectopic expression of Spir-1 increases IRF3-dependent gene expression induced by**  
581 **other stimuli, at or downstream of MAVS.** HEK293T cells were transfected with IFN $\beta$  (**A**), ISRE (**B**)  
582 and NF- $\kappa$ B (**C**) firefly luciferase reporter plasmids, together with TK-renilla luciferase and 40 ng of the  
583 plasmids for expression of the indicated proteins. After overnight transfection, cells were stimulated  
584 with SeV for 24 h (**A**), IFN $\alpha$  (**B**) or TNF- $\alpha$  (**C**) for 8 h. **D-I**) HEK293T cells were transfected with the  
585 ISG56.1 firefly luciferase reporter plasmid, TK-renilla luciferase and plasmids for expression of the  
586 indicated proteins. Cells were also co-transfected with EV as the non-stimulated (NS) controls or with  
587 the 5 ng of CARD-domain of RIG-I (**D**, **E** and **I**), 40 ng of MAVS (**F**), 40 ng of TBK-1 (**G**) and 5 ng of  
588 IRF3-5D (**H**) plasmids to activate the IRF3 pathway. EV was added to samples when necessary to  
589 keep the final amount of DNA transfected as 40 ng in all samples. Cell lysates were prepared and  
590 luciferase expression was measured and normalised to renilla luciferase. At least triplicate samples  
591 were analysed for each condition. Data are expressed as the mean ( $\pm$  SEM) fold induction of the  
592 firefly luciferase activity normalised to renilla values for the stimulated versus non-stimulated samples.  
593 Data shown are representative of three independent experiments. Immunoblots underneath each  
594 graph show the expression levels of the different proteins. The positions of molecular mass markers  
595 in kDa are shown on the right and the antibodies used are shown on the left. ns = not significant; \*P <  
596 0.05; \*\*\*\*P < 0.0001.

597

598 **Fig 3: Spir-1 and DDX3 share a conserved diphenylalanine motif that is required for IRF3**  
599 **activation and direct binding to K7.** (A) DDX3 knockdown was induced in HEK293T cells stably  
600 transfected with pTRIPZ-shDDX3 (or a NSC pTRIPZ vector) through incubation with doxycycline for  
601 48 h. Twenty-four h after doxycycline addition, cells were transfected with FLAG-tagged plasmids  
602 overnight. Cell lysates were immunoprecipitated using FLAG-affinity resin and analysed by SDS-  
603 PAGE and immunoblotting. (B) DDX3 knockdown was induced in HEK293T shDDX3 cells as in (A)  
604 and cells were then transfected with ISG56.1-firefly luciferase reporter, TK-renilla luciferase, plasmids  
605 for expression of the indicated proteins together with the CARD-domain. Cell lysates were prepared  
606 and analysed as in Fig 2. Immunoblots underneath the graph show the expression levels of the  
607 different proteins. (C) Alignment of amino acid residues of Spir-1 and DDX3 showing the conserved  
608 diphenylalanine motif. (D) HEK293T cells were transfected overnight with Myc-tagged Spir-1 wild  
609 type, GFP or Spir-1 mutant FFAA together with FLAG-K7. Cell lysates were immunoprecipitated using  
610 either Myc (middle panel) or FLAG-affinity resins (right panel) and analysed by SDS-PAGE and  
611 immunoblotting. (E) HEK293T cells were transfected with ISG56.1 firefly luciferase reporter, TK-  
612 renilla luciferase, plasmids for expression of the indicated proteins together with the CARD-domain of  
613 RIG-I or EV as the NS control. Cell lysates were prepared and analysed as in (B). The panel  
614 underneath the graph shows immunoblots for the expression level of K7 and GAPDH. (F, G) Myc or  
615 FLAG-tagged proteins were synthesized by *in vitro* transcription/translation. Samples were  
616 immunoprecipitated using FLAG- (F) or Myc-affinity resins (G) and analysed by SDS-PAGE and  
617 immunoblotting. For all immunoblots, the positions of molecular mass markers in kDa are shown on  
618 the left and the antibodies used on the right. ns = not significant; \*\*\*\*P < 0.0001. HC/LC: IgG heavy  
619 chain or light chain, respectively.

620

621 **Fig 4: K7 residue Asp31 is important for binding to Spir-1 and DDX3 and inhibition of IRF3**  
622 **activation.** HEK293T cells were transfected with FLAG-tagged GFP, K7 wild type or mutants, Myc-  
623 Spir-1 and HA-DDX3 (A) or with only FLAG-tagged plasmids overnight (B). Cell lysates were  
624 immunoprecipitated using FLAG-affinity resin and analysed by SDS-PAGE and immunoblotting. The  
625 positions of molecular mass markers in kDa are shown on the left and the antibodies used on the  
626 right. (C) HEK293T cells were transfected with ISG56.1-firefly luciferase reporter, TK-renilla  
627 luciferase, plasmids for expression of the indicated proteins together with the CARD-domain or EV as  
628 the NS control. Cell lysates were prepared and analysed as in Fig 2. Statistical analyses compared  
629 the fold induction of the mutant sample to its respective K7 wild type. The panel underneath the graph  
630 shows immunoblots for the expression levels of the different K7 proteins and  $\alpha$ -tubulin. The positions  
631 of molecular mass markers in kDa are shown on the right and the antibodies used on the left. ns =  
632 not significant; \*\*\*\*P < 0.0001. LC: IgG light chain.

633

634 **Fig 5: Spir-1 contributes to IRF3 phosphorylation and IRF3 stimulated gene expression after**  
635 **SeV infection in HEK293T cells.** (A) Schematic of CRISPR-Cas9-mediated knockout strategy  
636 targeting *Spire1* exon 3 and single allele sequences of HEK293T Spir-1 knockout (KO) cells. (B-F)  
637 Spir-1 knockout (KO) HEK293T cells were transduced with empty vector (EV) or Myc-Spir-1  
638 lentiviruses to rescue Spir-1 expression. Cells lines were either non-infected (NS) or infected with  
639 SeV for the indicated times. Cells were then either lysed and analysed by immunoblotting (B) or  
640 subjected to total RNA extraction followed by RT-qPCR (C-E). Supernatants were analysed by ELISA  
641 (F). (G) Spir-1 KO or wild type (WT) HEK293T cells were stimulated overnight with TNF $\alpha$  and  
642 supernatants were analysed by ELISA. ns = not significant, \*\*P < 0.01, \*\*\*P < 0.001, \*\*\*\*P < 0.0001.

643  
644 **Fig 6: IRF3 activation is reduced in Spir-1 KO MEFs.** Spir-1 WT or KO MEF cells were transfected  
645 with poly I:C (A, C-E, I-J) or infected with SeV (B, F-H, K-L) for the indicated times. Cells were lysed  
646 and analysed by immunoblotting (A, B) and phospho-IRF3 bands intensity was quantified and  
647 normalised by the intensity of  $\alpha$ -tubulin from at least two different experiments (A, B, bottom graphs).  
648 The positions of molecular mass markers in kDa are shown on the left and the antibodies used on the  
649 right. Cells were also subjected to total RNA extraction followed by RT-qPCR (C-H) and supernatants  
650 were analysed by ELISA (I-L). (M, N) Spir-1 WT or KO MEF cells were stimulated with IL-1 $\beta$  for 8 h  
651 and supernatants were analysed by ELISA. ns = not significant, \*P < 0.05, \*\*P < 0.01, \*\*\*\*P < 0.0001.

652  
653 **Fig 7: Spir-1 is a cellular restriction factor for VACV and ZIKV.** (A, B) Spir-1 WT or KO and Spir-  
654 1 KO complemented HEK293T cells were infected with VACV-A5-GFP and plaque diameters were  
655 measured at 48 h p.i. (A) Representative plaques formed in each cell line. (B) Plaques diameter  
656 measurements (n=54). (C) Spir-1 WT or KO and Spir-1 KO complemented HEK293T cells were  
657 infected with VACV WR at 0.001 PFU/cell for 48 h and the virus yield was measured in BSC-1 cells.  
658 ns = not significant, \*P<0.05, \*\*P < 0.01, \*\*\*P < 0.001, \*\*\*\*P < 0.0001. (D and E) Spir-1 WT or KO  
659 and Spir-1 KO complemented HEK293T cells were infected with ZIKV-mCherry at 0.01 PFU/cell for  
660 72 h and ZIKV-infected monolayers were imaged (D) or the virus yield was measured in VERO E6  
661 cells (E). ns = not significant, \*\*P < 0.01, \*\*\*P < 0.001.

662

663

## 664 Supporting information

665

666 **S1 Fig: Ectopic expression of Spir-1 doesn't affect IRF3-dependent gene expression induced**  
667 **by IKK $\epsilon$ .** HEK293T cells was transfected with the ISG56.1 firefly luciferase reporter plasmid, TK-  
668 renilla luciferase and plasmids for expression of the indicated proteins. Cells were also co-transfected  
669 with EV as the non-stimulated (NS) controls or with the 100 ng of IKK $\epsilon$  plasmid to activate the IRF3

670 pathway. EV was added to samples when necessary to keep the final amount of DNA transfected as  
671 40 ng in all samples. Cell lysates were prepared and luciferase expression was measured and  
672 normalised to renilla luciferase. At least triplicate samples were analysed for each condition. Data are  
673 expressed as the mean ( $\pm$  SEM) fold induction of the firefly luciferase activity normalised to renilla  
674 values for the stimulated versus non-stimulated samples. Data shown are representative of three  
675 independent experiments. Immunoblots underneath each graph show the expression levels of the  
676 different proteins. The positions of molecular mass markers in kDa are shown on the right and the  
677 antibodies used are shown on the left. ns = not significant; \*P < 0.05; \*\*\*\*P < 0.0001.

678

679 **S1 Table.** Plasmids used in the study

680

681 **S2 Table.** Oligonucleotides used in this study

682

683 **S3 Table.** Primary antibodies used in the study

684

## 685 References

686

- 687 1. Janeway CA, Jr., Medzhitov R. Innate immune recognition. *Annu Rev Immunol.* 2002;20:197-  
688 216.
- 689 2. Pang IK, Iwasaki A. Control of antiviral immunity by pattern recognition and the microbiome.  
690 *Immunol Rev.* 2012;245(1):209-26.
- 691 3. Thompson MR, Kaminski JJ, Kurt-Jones EA, Fitzgerald KA. Pattern recognition receptors and  
692 the innate immune response to viral infection. *Viruses.* 2011;3(6):920-40.
- 693 4. Randall RE, Goodbourn S. Interferons and viruses: an interplay between induction, signalling,  
694 antiviral responses and virus countermeasures. *J Gen Virol.* 2008;89(Pt 1):1-47.
- 695 5. Garcia-Sastre A. Ten Strategies of Interferon Evasion by Viruses. *Cell Host Microbe.*  
696 2017;22(2):176-84.
- 697 6. Fenner F, Henderson DA, Arita I, Jezek Z, Ladnyi ID. Smallpox and its eradication. World  
698 Health Organisation, Geneva. 1988.
- 699 7. Goebel SJ, Johnson GP, Perkus ME, Davis SW, Winslow JP, Paoletti E. The complete DNA  
700 sequence of vaccinia virus. *Virology.* 1990;179(1):247-66, 517-63.
- 701 8. Moss B, Smith GL. Poxviridae: the viruses and their replication. In: Howley PM, Knipe DM,  
702 editors. *Fields Virology: DNA viruses.* 2. 7th ed: Wolters Kluwer Inc; 2021. p. 573-613.
- 703 9. Smith GL, Benfield CTO, Maluquer de Motes C, Mazzon M, Ember SWJ, Ferguson BJ, et al.  
704 *Vaccinia virus immune evasion: mechanisms, virulence and immunogenicity.* *J Gen Virol.*  
705 2013;94(Pt 11):2367-92.
- 706 10. Benfield CTO, Ren H, Lucas SJ, Bahsoun B, Smith GL. Vaccinia virus protein K7 is a virulence  
707 factor that alters the acute immune response to infection. *J Gen Virol.* 2013;94(Pt 7):1647-57.
- 708 11. Schroder M, Baran M, Bowie AG. Viral targeting of DEAD box protein 3 reveals its role in  
709 TBK1/IKKepsilon-mediated IRF activation. *EMBO J.* 2008;27(15):2147-57.
- 710 12. Teferi WM, Desaulniers MA, Noyce RS, Shenouda M, Umer B, Evans DH. The vaccinia virus  
711 K7 protein promotes histone methylation associated with heterochromatin formation. *PLoS*  
712 *One.* 2017;12(3):e0173056.
- 713 13. Li Y, Zhang L, Ke Y. Cellular interactome analysis of vaccinia virus K7 protein identifies three  
714 transport machineries as binding partners for K7. *Virus Genes.* 2017;53(6):814-22.

- 715 14. Pichlmair A, Kandasamy K, Alvisi G, Mulhern O, Sacco R, Habjan M, et al. Viral immune  
716 modulators perturb the human molecular network by common and unique strategies. *Nature*.  
717 2012;487(7408):486-90.
- 718 15. Lu Y, Stuart JH, Talbot-Cooper C, Agrawal-Singh S, Huntly B, Smid AI, et al. Histone  
719 deacetylase 4 promotes type I interferon signaling, restricts DNA viruses, and is degraded via  
720 vaccinia virus protein C6. *Proc Natl Acad Sci U S A*. 2019;116(24):11997-2006.
- 721 16. Soday L, Lu Y, Albarnaz JD, Davies CTR, Antrobus R, Smith GL, et al. Quantitative Temporal  
722 Proteomic Analysis of Vaccinia Virus Infection Reveals Regulation of Histone Deacetylases by  
723 an Interferon Antagonist. *Cell Rep*. 2019;27(6):1920-33 e7.
- 724 17. Manseau LJ, Schupbach T. cappuccino and spire: two unique maternal-effect loci required for  
725 both the anteroposterior and dorsoventral patterns of the *Drosophila* embryo. *Genes Dev*.  
726 1989;3(9):1437-52.
- 727 18. Wellington A, Emmons S, James B, Calley J, Grover M, Toliás P, et al. Spire contains actin  
728 binding domains and is related to ascidian posterior end mark-5. *Development*.  
729 1999;126(23):5267-74.
- 730 19. Quinlan ME, Heuser JE, Kerkhoff E, Mullins RD. *Drosophila* Spire is an actin nucleation factor.  
731 *Nature*. 2005;433(7024):382-8.
- 732 20. Pechlivanis M, Samol A, Kerkhoff E. Identification of a short Spir interaction sequence at the C-  
733 terminal end of formin subgroup proteins. *J Biol Chem*. 2009;284(37):25324-33.
- 734 21. Bosch M, Le KH, Bugyi B, Correia JJ, Renault L, Carlier MF. Analysis of the function of Spire in  
735 actin assembly and its synergy with formin and profilin. *Mol Cell*. 2007;28(4):555-68.
- 736 22. Quinlan ME, Hilgert S, Bedrossian A, Mullins RD, Kerkhoff E. Regulatory interactions between  
737 two actin nucleators, Spire and Cappuccino. *J Cell Biol*. 2007;179(1):117-28.
- 738 23. Pfender S, Kuznetsov V, Pleiser S, Kerkhoff E, Schuh M. Spire-type actin nucleators cooperate  
739 with Formin-2 to drive asymmetric oocyte division. *Curr Biol*. 2011;21(11):955-60.
- 740 24. Schuh M. An actin-dependent mechanism for long-range vesicle transport. *Nat Cell Biol*.  
741 2011;13(12):1431-6.
- 742 25. Vizcarra CL, Kreutz B, Rodal AA, Toms AV, Lu J, Zheng W, et al. Structure and function of the  
743 interacting domains of Spire and Fmn-family formins. *Proc Natl Acad Sci U S A*.  
744 2011;108(29):11884-9.
- 745 26. Zeth K, Pechlivanis M, Samol A, Pleiser S, Vornrhein C, Kerkhoff E. Molecular basis of actin  
746 nucleation factor cooperativity: crystal structure of the Spir-1 kinase non-catalytic C-lobe  
747 domain (KIND)\*formin-2 formin SPIR interaction motif (FSI) complex. *J Biol Chem*.  
748 2011;286(35):30732-9.
- 749 27. Quinlan ME. Direct interaction between two actin nucleators is required in *Drosophila*  
750 oogenesis. *Development*. 2013;140(21):4417-25.
- 751 28. Montaville P, Jegou A, Pernier J, Compper C, Guichard B, Mogessie B, et al. Spire and Formin  
752 2 synergize and antagonize in regulating actin assembly in meiosis by a ping-pong mechanism.  
753 *PLoS Biol*. 2014;12(2):e1001795.
- 754 29. Tittel J, Welz T, Czogalla A, Dietrich S, Samol-Wolf A, Schulte M, et al. Membrane targeting of  
755 the Spir.formin actin nucleator complex requires a sequential handshake of polar interactions. *J*  
756 *Biol Chem*. 2015;290(10):6428-44.
- 757 30. Ducka AM, Joel P, Popowicz GM, Trybus KM, Schleicher M, Noegel AA, et al. Structures of  
758 actin-bound Wiskott-Aldrich syndrome protein homology 2 (WH2) domains of Spire and the  
759 implication for filament nucleation. *Proc Natl Acad Sci U S A*. 2010;107(26):11757-62.
- 760 31. Sitar T, Gallinger J, Ducka AM, Ikonen TP, Wohlhoefer M, Schmoller KM, et al. Molecular  
761 architecture of the Spire-actin nucleus and its implication for actin filament assembly. *Proc Natl*  
762 *Acad Sci U S A*. 2011;108(49):19575-80.
- 763 32. Pylypenko O, Welz T, Tittel J, Kollmar M, Chardon F, Malherbe G, et al. Coordinated  
764 recruitment of Spir actin nucleators and myosin V motors to Rab11 vesicle membranes. *Elife*.  
765 2016;5.
- 766 33. Alzahofi N, Welz T, Robinson CL, Page EL, Briggs DA, Stainthorp AK, et al. Rab27a co-  
767 ordinates actin-dependent transport by controlling organelle-associated motors and track  
768 assembly proteins. *Nat Commun*. 2020;11(1):3495.

- 769 34. Kerkhoff E, Simpson JC, Leberfinger CB, Otto IM, Doerks T, Bork P, et al. The Spir actin  
770 organizers are involved in vesicle transport processes. *Curr Biol*. 2001;11(24):1963-8.
- 771 35. Lagal V, Abrivard M, Gonzalez V, Perazzi A, Popli S, Verzeroli E, et al. Spire-1 contributes to  
772 the invadosome and its associated invasive properties. *J Cell Sci*. 2014;127(Pt 2):328-40.
- 773 36. Schumacher N, Borawski JM, Leberfinger CB, Gessler M, Kerkhoff E. Overlapping expression  
774 pattern of the actin organizers Spir-1 and formin-2 in the developing mouse nervous system  
775 and the adult brain. *Gene Expr Patterns*. 2004;4(3):249-55.
- 776 37. Pleiser S, Rock R, Wellmann J, Gessler M, Kerkhoff E. Expression patterns of the mouse Spir-2  
777 actin nucleator. *Gene Expr Patterns*. 2010;10(7-8):345-50.
- 778 38. Fagerberg L, Hallstrom BM, Oksvold P, Kampf C, Djureinovic D, Odeberg J, et al. Analysis of  
779 the human tissue-specific expression by genome-wide integration of transcriptomics and  
780 antibody-based proteomics. *Mol Cell Proteomics*. 2014;13(2):397-406.
- 781 39. Morel E, Parton RG, Gruenberg J. Annexin A2-dependent polymerization of actin mediates  
782 endosome biogenesis. *Dev Cell*. 2009;16(3):445-57.
- 783 40. Belin BJ, Lee T, Mullins RD. DNA damage induces nuclear actin filament assembly by Formin -  
784 2 and Spire-(1/2) that promotes efficient DNA repair. [corrected]. *Elife*. 2015;4:e07735.
- 785 41. Manor U, Bartholomew S, Golani G, Christenson E, Kozlov M, Higgs H, et al. A mitochondria-  
786 anchored isoform of the actin-nucleating spire protein regulates mitochondrial division. *Elife*.  
787 2015;4.
- 788 42. Wen Q, Li N, Xiao X, Lui WY, Chu DS, Wong CKC, et al. Actin nucleator Spire 1 is a regulator  
789 of ectoplasmic specialization in the testis. *Cell Death Dis*. 2018;9(2):208.
- 790 43. Ovsyannikova IG, Kennedy RB, O'Byrne M, Jacobson RM, Pankratz VS, Poland GA. Genome-  
791 wide association study of antibody response to smallpox vaccine. *Vaccine*. 2012;30(28):4182-9.
- 792 44. Kerkhoff E. Cellular functions of the Spir actin-nucleation factors. *Trends Cell Biol*.  
793 2006;16(9):477-83.
- 794 45. Kollmar M, Welz T, Straub F, Alzahofi N, Hatje K, Briggs DA, et al. Animal evolution coincides  
795 with a novel degree of freedom in exocytic transport processes. *bioRxiv*.  
796 2020;<https://doi.org/10.1101/591974>.
- 797 46. Neidel S, Maluquer de Motes C, Mansur DS, Strnadova P, Smith GL, Graham SC. Vaccinia  
798 virus protein A49 is an unexpected member of the B-cell Lymphoma (Bcl)-2 protein family. *J*  
799 *Biol Chem*. 2015;290(10):5991-6002.
- 800 47. Mansur DS, Maluquer de Motes C, Unterholzner L, Sumner RP, Ferguson BJ, Ren H, et al.  
801 Poxvirus targeting of E3 ligase beta-TrCP by molecular mimicry: a mechanism to inhibit NF-  
802 kappaB activation and promote immune evasion and virulence. *PLoS Pathog*.  
803 2013;9(2):e1003183.
- 804 48. Benzinger A, Muster N, Koch HB, Yates JR, 3rd, Hermeking H. Targeted proteomic analysis of  
805 14-3-3 sigma, a p53 effector commonly silenced in cancer. *Mol Cell Proteomics*. 2005;4(6):785-  
806 95.
- 807 49. Ewing RM, Chu P, Elisma F, Li H, Taylor P, Climie S, et al. Large-scale mapping of human  
808 protein-protein interactions by mass spectrometry. *Mol Syst Biol*. 2007;3:89.
- 809 50. Chen RA, Jacobs N, Smith GL. Vaccinia virus strain Western Reserve protein B14 is an  
810 intracellular virulence factor. *J Gen Virol*. 2006;87(Pt 6):1451-8.
- 811 51. Chen RA, Ryzhakov G, Cooray S, Randow F, Smith GL. Inhibition of I kappa B kinase by  
812 vaccinia virus virulence factor B14. *PLoS Pathog*. 2008;4(2):e22.
- 813 52. Kato H, Takeuchi O, Sato S, Yoneyama M, Yamamoto M, Matsui K, et al. Differential roles of  
814 MDA5 and RIG-I helicases in the recognition of RNA viruses. *Nature*. 2006;441(7089):101-5.
- 815 53. Unterholzner L, Sumner RP, Baran M, Ren H, Mansur DS, Bourke NM, et al. Vaccinia virus  
816 protein C6 is a virulence factor that binds TBK-1 adaptor proteins and inhibits activation of IRF3  
817 and IRF7. *PLoS Pathog*. 2011;7(9):e1002247.
- 818 54. Stuart JH, Sumner RP, Lu Y, Snowden JS, Smith GL. Vaccinia Virus Protein C6 Inhibits Type I  
819 IFN Signalling in the Nucleus and Binds to the Transactivation Domain of STAT2. *PLoS Pathog*.  
820 2016;12(12):e1005955.
- 821 55. Ferguson BJ, Benfield CTO, Ren H, Lee VH, Frazer GL, Strnadova P, et al. Vaccinia virus  
822 protein N2 is a nuclear IRF3 inhibitor that promotes virulence. *J Gen Virol*. 2013;94(Pt 9):2070-  
823 81.

- 824 56. Kalverda AP, Thompson GS, Vogel A, Schroder M, Bowie AG, Khan AR, et al. Poxvirus K7  
825 protein adopts a Bcl-2 fold: biochemical mapping of its interactions with human DEAD box RNA  
826 helicase DDX3. *J Mol Biol.* 2009;385(3):843-53.
- 827 57. Oda S, Schroder M, Khan AR. Structural basis for targeting of human RNA helicase DDX3 by  
828 poxvirus protein K7. *Structure.* 2009;17(11):1528-37.
- 829 58. Fullam A, Schroder M. DExD/H-box RNA helicases as mediators of anti-viral innate immunity  
830 and essential host factors for viral replication. *Biochim Biophys Acta.* 2013;1829(8):854-65.
- 831 59. Gu L, Fullam A, McCormack N, Hohn Y, Schroder M. DDX3 directly regulates TRAF3  
832 ubiquitination and acts as a scaffold to co-ordinate assembly of signalling complexes  
833 downstream from MAVS. *Biochem J.* 2017;474(4):571-87.
- 834 60. Wang T, Birsoy K, Hughes NW, Krupczak KM, Post Y, Wei JJ, et al. Identification and  
835 characterization of essential genes in the human genome. *Science.* 2015;350(6264):1096-101.
- 836 61. Carpentier DC, Gao WN, Ewles H, Morgan GW, Smith GL. Vaccinia virus protein complex  
837 F12/E2 interacts with kinesin light chain isoform 2 to engage the kinesin-1 motor complex.  
838 *PLoS Pathog.* 2015;11(3):e1004723.
- 839 62. Everett RD, Parsy ML, Orr A. Analysis of the functions of herpes simplex virus type 1 regulatory  
840 protein ICP0 that are critical for lytic infection and derepression of quiescent viral genomes. *J*  
841 *Viro.* 2009;83(10):4963-77.
- 842 63. Stinski MF, Meier JL. Immediate-early viral gene regulation and function. In: Arvin A,  
843 Campadelli-Fiume G, Mocarski E, Moore PS, Roizman B, Whitley R, et al., editors. *Human*  
844 *Herpesviruses: Biology, Therapy, and Immunoprophylaxis.* Cambridge 2007.
- 845 64. Servant MJ, Grandvaux N, tenOever BR, Duguay D, Lin R, Hiscott J. Identification of the  
846 minimal phosphoacceptor site required for in vivo activation of interferon regulatory factor 3 in  
847 response to virus and double-stranded RNA. *J Biol Chem.* 2003;278(11):9441-7.
- 848 65. Pleiser S, Banchaabouchi MA, Samol-Wolf A, Farley D, Welz T, Wellbourne-Wood J, et al.  
849 Enhanced fear expression in Spir-1 actin organizer mutant mice. *Eur J Cell Biol.* 2014;93(5-  
850 6):225-37.
- 851 66. Carter GC, Rodger G, Murphy BJ, Law M, Krauss O, Hollinshead M, et al. Vaccinia virus cores  
852 are transported on microtubules. *J Gen Virol.* 2003;84(Pt 9):2443-58.
- 853 67. Neidel S, Torres AA, Ren H, Smith GL. Leaky scanning translation generates a second A49  
854 protein that contributes to vaccinia virus virulence. *J Gen Virol.* 2020;101(5):533-41.
- 855 68. Smith GL, Vanderplasschen A, Law M. The formation and function of extracellular enveloped  
856 vaccinia virus. *J Gen Virol.* 2002;83(Pt 12):2915-31.
- 857 69. Kato H, Sato S, Yoneyama M, Yamamoto M, Uematsu S, Matsui K, et al. Cell type-specific  
858 involvement of RIG-I in antiviral response. *Immunity.* 2005;23(1):19-28.
- 859 70. Kato H, Takeuchi O, Mikamo-Satoh E, Hirai R, Kawai T, Matsushita K, et al. Length-dependent  
860 recognition of double-stranded ribonucleic acids by retinoic acid-inducible gene-I and  
861 melanoma differentiation-associated gene 5. *J Exp Med.* 2008;205(7):1601-10.
- 862 71. Brisse M, Ly H. Comparative Structure and Function Analysis of the RIG-I-Like Receptors: RIG-  
863 I and MDA5. *Front Immunol.* 2019;10:1586.
- 864 72. Soulat D, Burckstummer T, Westermayer S, Goncalves A, Bauch A, Stefanovic A, et al. The  
865 DEAD-box helicase DDX3X is a critical component of the TANK-binding kinase 1-dependent  
866 innate immune response. *EMBO J.* 2008;27(15):2135-46.
- 867 73. Seth RB, Sun L, Ea CK, Chen ZJ. Identification and characterization of MAVS, a mitochondrial  
868 antiviral signaling protein that activates NF-kappaB and IRF 3. *Cell.* 2005;122(5):669-82.
- 869 74. Weber F, Wagner V, Rasmussen SB, Hartmann R, Paludan SR. Double-stranded RNA is  
870 produced by positive-strand RNA viruses and DNA viruses but not in detectable amounts by  
871 negative-strand RNA viruses. *J Virol.* 2006;80(10):5059-64.
- 872 75. Liu Y, Olganier D, Lin R. Host and Viral Modulation of RIG-I-Mediated Antiviral Immunity. *Front*  
873 *Immunol.* 2016;7:662.
- 874 76. Serman TM, Gack MU. Evasion of Innate and Intrinsic Antiviral Pathways by the Zika Virus.  
875 *Viruses.* 2019;11(10).
- 876 77. Colby C, Duesberg PH. Double-stranded RNA in vaccinia virus infected cells. *Nature.*  
877 1969;222(5197):940-4.

- 878 78. Rice AP, Roberts WK, Kerr IM. 2-5A accumulates to high levels in interferon-treated, vaccinia  
879 virus-infected cells in the absence of any inhibition of virus replication. *J Virol.* 1984;50(1):220-  
880 8.
- 881 79. Pichlmair A, Schulz O, Tan CP, Rehwinkel J, Kato H, Takeuchi O, et al. Activation of MDA5  
882 requires higher-order RNA structures generated during virus infection. *J Virol.*  
883 2009;83(20):10761-9.
- 884 80. Marq JB, Hausmann S, Luban J, Kolakofsky D, Garcin D. The double-stranded RNA binding  
885 domain of the vaccinia virus E3L protein inhibits both RNA- and DNA-induced activation of  
886 interferon beta. *J Biol Chem.* 2009;284(38):25471-8.
- 887 81. Valentine R, Smith GL. Inhibition of the RNA polymerase III-mediated dsDNA-sensing pathway  
888 of innate immunity by vaccinia virus protein E3. *J Gen Virol.* 2010;91(Pt 9):2221-9.
- 889 82. Liu SW, Katsafanas GC, Liu R, Wyatt LS, Moss B. Poxvirus decapping enzymes enhance  
890 virulence by preventing the accumulation of dsRNA and the induction of innate antiviral  
891 responses. *Cell Host Microbe.* 2015;17(3):320-31.
- 892 83. Mutso M, Saul S, Rausalu K, Susova O, Zusinaite E, Mahalingam S, et al. Reverse genetic  
893 system, genetically stable reporter viruses and packaged subgenomic replicon based on a  
894 Brazilian Zika virus isolate. *J Gen Virol.* 2017;98(11):2712-24.
- 895 84. Torres AA, Albarnaz JD, Bonjardim CA, Smith GL. Multiple Bcl-2 family immunomodulators  
896 from vaccinia virus regulate MAPK/AP-1 activation. *J Gen Virol.* 2016;97(9):2346-51.
- 897 85. Odon V, Georgana I, Holley J, Morata J, Maluquer de Motes C. Novel Class of Viral Ankyrin  
898 Proteins Targeting the Host E3 Ubiquitin Ligase Cullin-2. *J Virol.* 2018;92(23).
- 899 86. Everett RD, Bell AJ, Lu Y, Orr A. The replication defect of ICP0-null mutant herpes simplex  
900 virus 1 can be largely complemented by the combined activities of human cytomegalovirus  
901 proteins IE1 and pp71. *J Virol.* 2013;87(2):978-90.
- 902 87. Ran FA, Hsu PD, Wright J, Agarwala V, Scott DA, Zhang F. Genome engineering using the  
903 CRISPR-Cas9 system. *Nat Protoc.* 2013;8(11):2281-308.
- 904

905

## 906 Supporting information

907

908 **S1 Fig. Ectopic expression of Spir-1 does not affect IRF3-dependent gene expression induced**  
909 **by IKK $\epsilon$  (related to Figure 2).** HEK293T cells were transfected with the ISG56.1 firefly luciferase  
910 reporter plasmid, TK-renilla luciferase and plasmids for expression of the indicated proteins. Cells  
911 were also co-transfected with EV as the non-stimulated (NS) controls or with 100 ng of IKK $\epsilon$  plasmid  
912 to activate the IRF3 pathway. EV was added to samples when necessary to keep the final amount of  
913 DNA transfected as 40 ng in all samples. Cell lysates were prepared and luciferase expression was  
914 measured and normalised to renilla luciferase. At least triplicate samples were analysed for each  
915 condition. Data are expressed as the mean ( $\pm$  SEM) fold induction of the firefly luciferase activity  
916 normalised to renilla values for the stimulated versus non-stimulated samples. Data shown are  
917 representative of three independent experiments. Immunoblots underneath each graph show the  
918 expression levels of the different proteins. The positions of molecular mass markers in kDa are shown  
919 on the right and the antibodies used are shown on the left. ns = not significant; \*P < 0.05; \*\*\*\*P <  
920 0.0001.

921

922

## 923 S1 Table. Plasmids used in the study

924

| PLASMID                    | SOURCE                                                                    |
|----------------------------|---------------------------------------------------------------------------|
| human nMyc-Spir-1-pcDNA3.1 | Gift from Prof. Dr. E. Kerkhoff (University Hospital Regensburg, Germany) |
| human nMyc-Spir-2-pcDNA3.1 | Gift from Prof. Dr. E. Kerkhoff (University Hospital Regensburg, Germany) |
| mouse nMyc-B-TrCP-pcDNA3.1 | (Mansur <i>et al</i> , 2013)                                              |



|                                 |                                                           |
|---------------------------------|-----------------------------------------------------------|
| GFP-Myc-pCMV                    | (Neidel <i>et al</i> , 2019)                              |
| nFlag-coK7-pcDNA4/TO            | (Torres <i>et al</i> , 2016)                              |
| coA49-cFlag-pcDNA3.1            | (Neidel <i>et al.</i> , 2019)                             |
| GFP-cFlag-pcDNA4/TO             | Sarah Neidel (Prof. G.L. Smith laboratory)                |
| human nMyc-Spir-1-NT-pcDNA3.1   | This study                                                |
| human nMyc-Spir-1-CT-pcDNA3.1   | This study                                                |
| coN1-cTAP-pcDNA4/TO             | (Maluquer de Motes <i>et al</i> , 2011)                   |
| coC6-cTAP-pcDNA4/TO             | (Unterholzner <i>et al</i> , 2011)                        |
| nTAP-coN2-pcDNA4/TO             | (Ferguson <i>et al</i> , 2013)                            |
| nFlag-coB14-pcDNA4/TO           | (Torres <i>et al.</i> , 2016)                             |
| pcDNA4/TO                       | Invitrogen                                                |
| nMyc-DDX3-pCMV                  | Gift from Dr M. Schröder - (Gu <i>et al</i> , 2013)       |
| nHA-DDX3-pCMV                   | Gift from Dr M. Schröder - (Gu <i>et al.</i> , 2013)      |
| IFN- $\beta$ -luc               | Gift from Dr T. Taniguchi (University of Tokyo, Japan)    |
| ISRE-luc                        | Gift from Dr. A. Bowie (Trinity College, Dublin, Ireland) |
| NF- $\kappa$ B-luc              | Gift from Dr. A. Bowie (Trinity College, Dublin, Ireland) |
| ISG56.1-luc                     | Gift from G. Sen (Cleveland Clinic, Cleveland, OH, USA).  |
| TK-Renilla                      | Promega                                                   |
| Flag-RIG-I-CARD                 | Gift from A. Garcia-Sastre (Mount Sinai, New York, USA)   |
| HA-MAVS                         | (Unterholzner <i>et al.</i> , 2011)                       |
| Flag-TBK1                       | (Unterholzner <i>et al.</i> , 2011)                       |
| Flag-IKKe                       | (Unterholzner <i>et al.</i> , 2011)                       |
| IRF3-5D                         | (Unterholzner <i>et al.</i> , 2011)                       |
| human nMyc-Spir-1-FFAA-pcDNA3.1 | This study                                                |
| pF3A-nFlag-coK7                 | This study                                                |
| pF3A-nMyc-Spir-1                | This study                                                |
| pF3A-nMyc-DDX3                  | This study                                                |
| pF3A-F12-cFlagd                 | GLS - unpublished                                         |
| pF3A-nMyc-TAB2                  | GLS - unpublished                                         |
| nFlag-coK7-D28A-pcDNA4/TO       | This study                                                |
| nFlag-coK7-D31A-pcDNA4/TO       | This study                                                |
| nFlag-coK7-DDAA-pcDNA4/TO       | This study                                                |
| pSpCas9(BB)-2A-Puro (px459)     | (Ran <i>et al</i> , 2013) - Addgene plasmid #62988        |
| px459-Spir-1-sgRNA#2            | This study                                                |
| pLKO.DCMV.TetO.mcs              | (Everett <i>et al</i> , 2013)                             |
| pLKO.DCMV.TetO.Myc-Spir-1       | This study                                                |
| pCMV.dR8.91                     | Gift from Dr H. Laman (Lomonosov <i>et al</i> , 2011)     |
| pMD-G                           | Gift from Dr H. Laman (Lomonosov <i>et al.</i> , 2011)    |

926  
927  
928

**S2 Table. Oligonucleotides used in this study**

| PLASMID CONSTRUCTION                             | PRIMER                                                    |
|--------------------------------------------------|-----------------------------------------------------------|
| human nMyc-Spir-1-CT-pcDNA3.1                    | AAAAGCGGCCGCCAGTGTGATGGATGGGTCAGATCTCACTGAT               |
|                                                  | AAAAGGATCCGCCGCCGCCATGGAGCAGAAGCTGATCTCCGAGGAGGACCTGGCT   |
| human nMyc-Spir-1-NT-pcDNA3.1                    | AAAAGCGGCCGCCAGTGTGATGGATGGGTCACTCCTCTGGTGATACAGGCCGCAGCT |
|                                                  | AAGCTTGGTACCGAGCTCGGATCCGCCG                              |
| pLKO.DCMV.TetO.Myc-Spir-1                        | AAAACGCGTGCCGCCAGTGTGATGGATGGGTCAGATCTCACTGATCGTCCT       |
|                                                  | AAAAGCTAGCGCCGCCGCCATGGAGCAGAAGCTGATCTCCGAGGAGGA          |
| human nMyc-Spir-1-FFAA-pcDNA3.1                  | TTGCCGAACCAGGAGGTTTTCCGCCGCCACTTGGTCTTATACCTGTCAAG        |
|                                                  | CTGACAGGTATAAGACCAAGTGGCGGGCGGAAAACCTCCTGGTTCGGCAAA       |
| nFlag-coK7-D28A-pcDNA4.1/TO                      | CGGGACAGCATCATCGCCCTGATCGACGAGTAC                         |
|                                                  | GTA CT CGT CGAT CAG G GCG AT GAT GCT GT C CCG             |
| nFlag-coK7-D31A-pcDNA4.1/TO                      | GCATCATCGACCTGATCGCCGAGTACATCACCTGGCG                     |
|                                                  | CGCCAGGTGATGTA CT CG GCG AT CAG GT CG AT GAT GC           |
| nFlag-coK7-DDAA-pcDNA4.1/TO                      | CGGGACAGCATCATCGCCCTGATCGCCGAGTAC                         |
|                                                  | GTA CT CG GCG AT CAG G GCG AT GAT GCT GT C CCG            |
| pF3A-nFlag-coK7                                  | AAAAGCGATCGCATGGACTACAAAGACGATGACGACAAG                   |
|                                                  | AAAATTTAAACTCAGTTCAGCTTCTTTTCCAGGAA                       |
| pF3A-nMyc-Spir-1                                 | AAAAGCGATCGCATGGAGCAGAAGCTGATCTCCGA                       |
|                                                  | AAAATTTAAACTCAGATCTCACTGATCGTCCTCTC                       |
| pF3A-nMyc-DDX3                                   | AAAAGTTTAAACTCAGTTACCCACCCAGTCAACCC                       |
|                                                  | AAAAGCGATCGCATGGAGCAGAAGCTGATCTCAGAGGA                    |
| <b>CRISPR/Cas9 gRNA targeting region</b>         | <b>gRNA SEQUENCE</b>                                      |
| <i>Spire1</i> exon 3                             | AGAGCAGCTTATCGATCACA                                      |
| <b>SEQUENCING PRIMERS</b>                        |                                                           |
| Forward primer for exon 3 of human <i>Spire1</i> | TGGGAAATGTGGAAATCAACTCG                                   |
| Reverse primer for exon 3 of human <i>Spire1</i> | AAAATAACAGCTTGGACACAGTGG                                  |

929  
930  
931  
932

**S3 Table. Primary antibodies used in the study**

| ANTIBODIES  | SOURCE               | DILUTION  |
|-------------|----------------------|-----------|
| Rb anti-Myc | Cell Signaling, 2278 | 1 in 1000 |

|                       |                                     |           |
|-----------------------|-------------------------------------|-----------|
| Ms anti-Myc           | Cell Signaling, 9B11                | 1 in 1000 |
| Rb anti-Actin         | Sigma, A2066                        | 1 in 1000 |
| Ms anti-Flag          | Sigma, F1804                        | 1 in 1000 |
| Rb anti-14-3-3        | Santa Cruz, sc-629                  | 1 in 1000 |
| Ms anti-Spir-1        | Santa Cruz, sc-517039               | 1 in 500  |
| Ms anti-Spir-1        | Abcam, ab57463                      | 1 in 1000 |
| Rb anti-DDX3          | Cell Signaling, 2635                | 1 in 1000 |
| Rb anti-IKKb          | Cell Signaling, 2684                | 1 in 1000 |
| Rb anti-HA            | Sigma, H6908                        | 1 in 1000 |
| Rb anti-C6            | (Unterholzner <i>et al.</i> , 2011) | 1 in 1000 |
| Ms anti-alpha-Tubulin | Millipore, 05-829                   | 1 in 5000 |
| Ms anti-GAPDH         | Sigma, G8795                        | 1 in 1000 |
| Rb anti-IRF3          | Cell Signaling, 4962                | 1 in 1000 |
| Ms anti-COPE          | Santa Cruz, sc-133194               | 1 in 500  |
| Rb anti-p-IRF3        | Cell Signaling, 4947S               | 1 in 1000 |

933

934

935

936

## References

937

Everett RD, Bell AJ, Lu Y, Orr A (2013) The replication defect of ICP0-null mutant herpes simplex virus 1 can be largely complemented by the combined activities of human cytomegalovirus proteins IE1 and pp71. *J Virol* 87: 978-990

938

Ferguson BJ, Benfield CTO, Ren H, Lee VH, Frazer GL, Strnadova P, Sumner RP, Smith GL (2013) Vaccinia virus protein N2 is a nuclear IRF3 inhibitor that promotes virulence. *J Gen Virol* 94: 2070-2081

943

Gu L, Fullam A, Brennan R, Schroder M (2013) Human DEAD box helicase 3 couples IkkappaB kinase epsilon to interferon regulatory factor 3 activation. *Mol Cell Biol* 33: 2004-2015

944

Lomonosov M, Meziane el K, Ye H, Nelson DE, Randle SJ, Laman H (2011) Expression of Fbxo7 in haematopoietic progenitor cells cooperates with p53 loss to promote lymphomagenesis. *PLoS One* 6: e21165

945

Maluquer de Motes C, Cooray S, Ren H, Almeida GM, McGourty K, Bahar MW, Stuart DI, Grimes JM, Graham SC, Smith GL (2011) Inhibition of apoptosis and NF-kappaB activation by vaccinia protein N1 occur via distinct binding surfaces and make different contributions to virulence. *PLoS Pathog* 7: e1002430

949

Mansur DS, Maluquer de Motes C, Unterholzner L, Sumner RP, Ferguson BJ, Ren H, Strnadova P, Bowie AG, Smith GL (2013) Poxvirus targeting of E3 ligase beta-TrCP by molecular mimicry: a mechanism to inhibit NF-kappaB activation and promote immune evasion and virulence. *PLoS Pathog* 9: e1003183

952

Neidel S, Ren H, Torres AA, Smith GL (2019) NF-kappaB activation is a turn on for vaccinia virus phosphoprotein A49 to turn off NF-kappaB activation. *Proc Natl Acad Sci U S A* 116: 5699-5704

956

Ran FA, Hsu PD, Wright J, Agarwala V, Scott DA, Zhang F (2013) Genome engineering using the CRISPR-Cas9 system. *Nat Protoc* 8: 2281-2308

958

Torres AA, Albarnaz JD, Bonjardim CA, Smith GL (2016) Multiple Bcl-2 family immunomodulators from vaccinia virus regulate MAPK/AP-1 activation. *J Gen Virol* 97: 2346-2351

960

Unterholzner L, Sumner RP, Baran M, Ren H, Mansur DS, Bourke NM, Randow F, Smith GL, Bowie AG (2011) Vaccinia virus protein C6 is a virulence factor that binds TBK-1 adaptor proteins and inhibits activation of IRF3 and IRF7. *PLoS Pathog* 7: e1002247

962

963

964

965

966

967 Fig 1

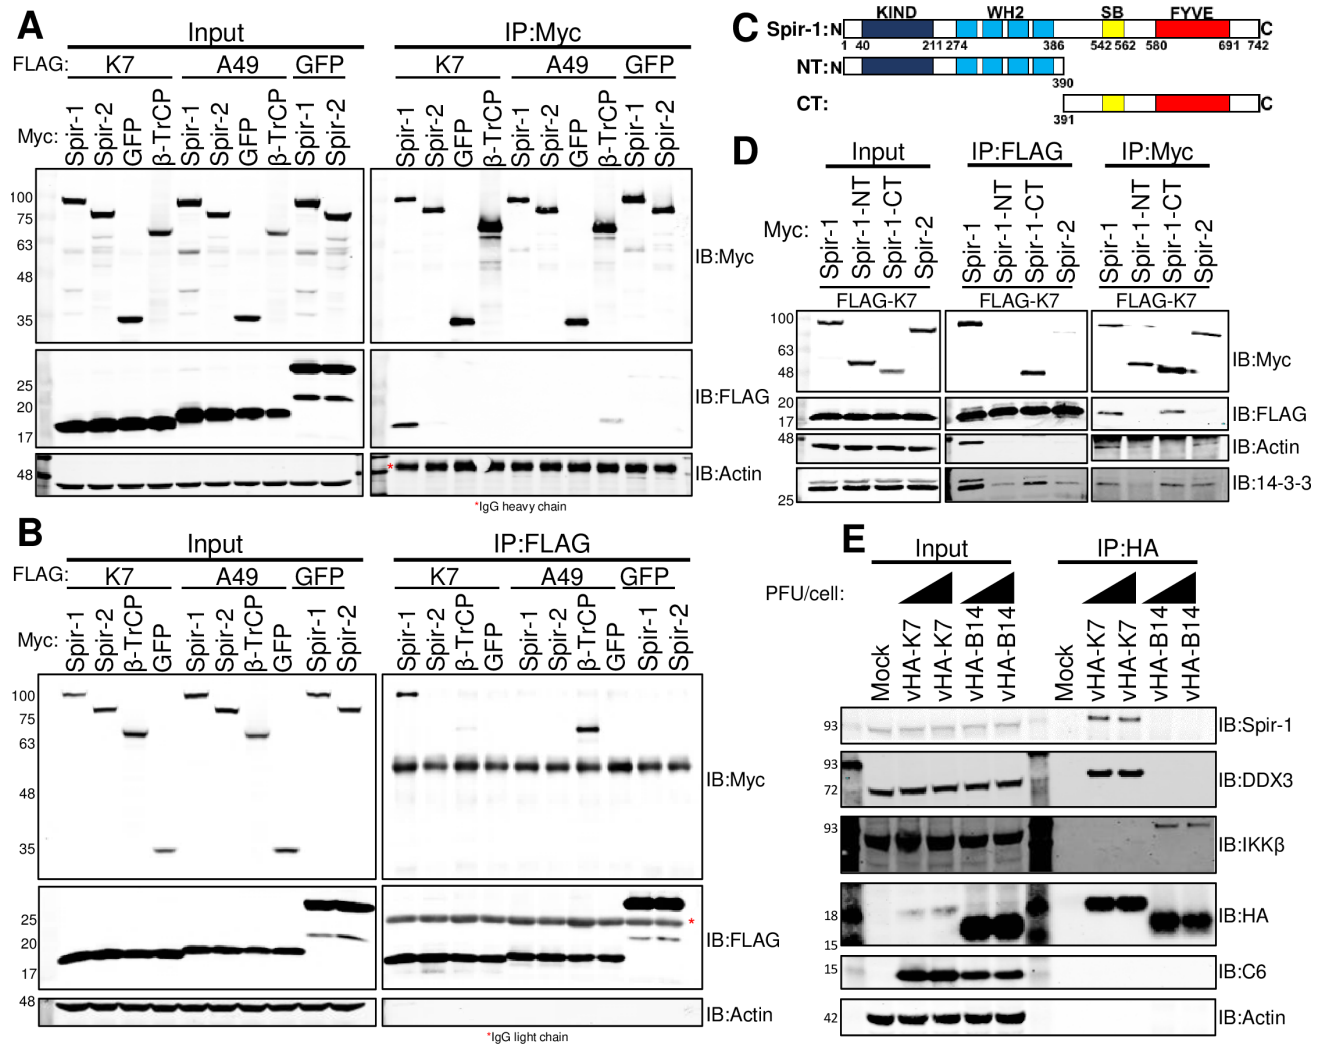

968

969

Fig 2

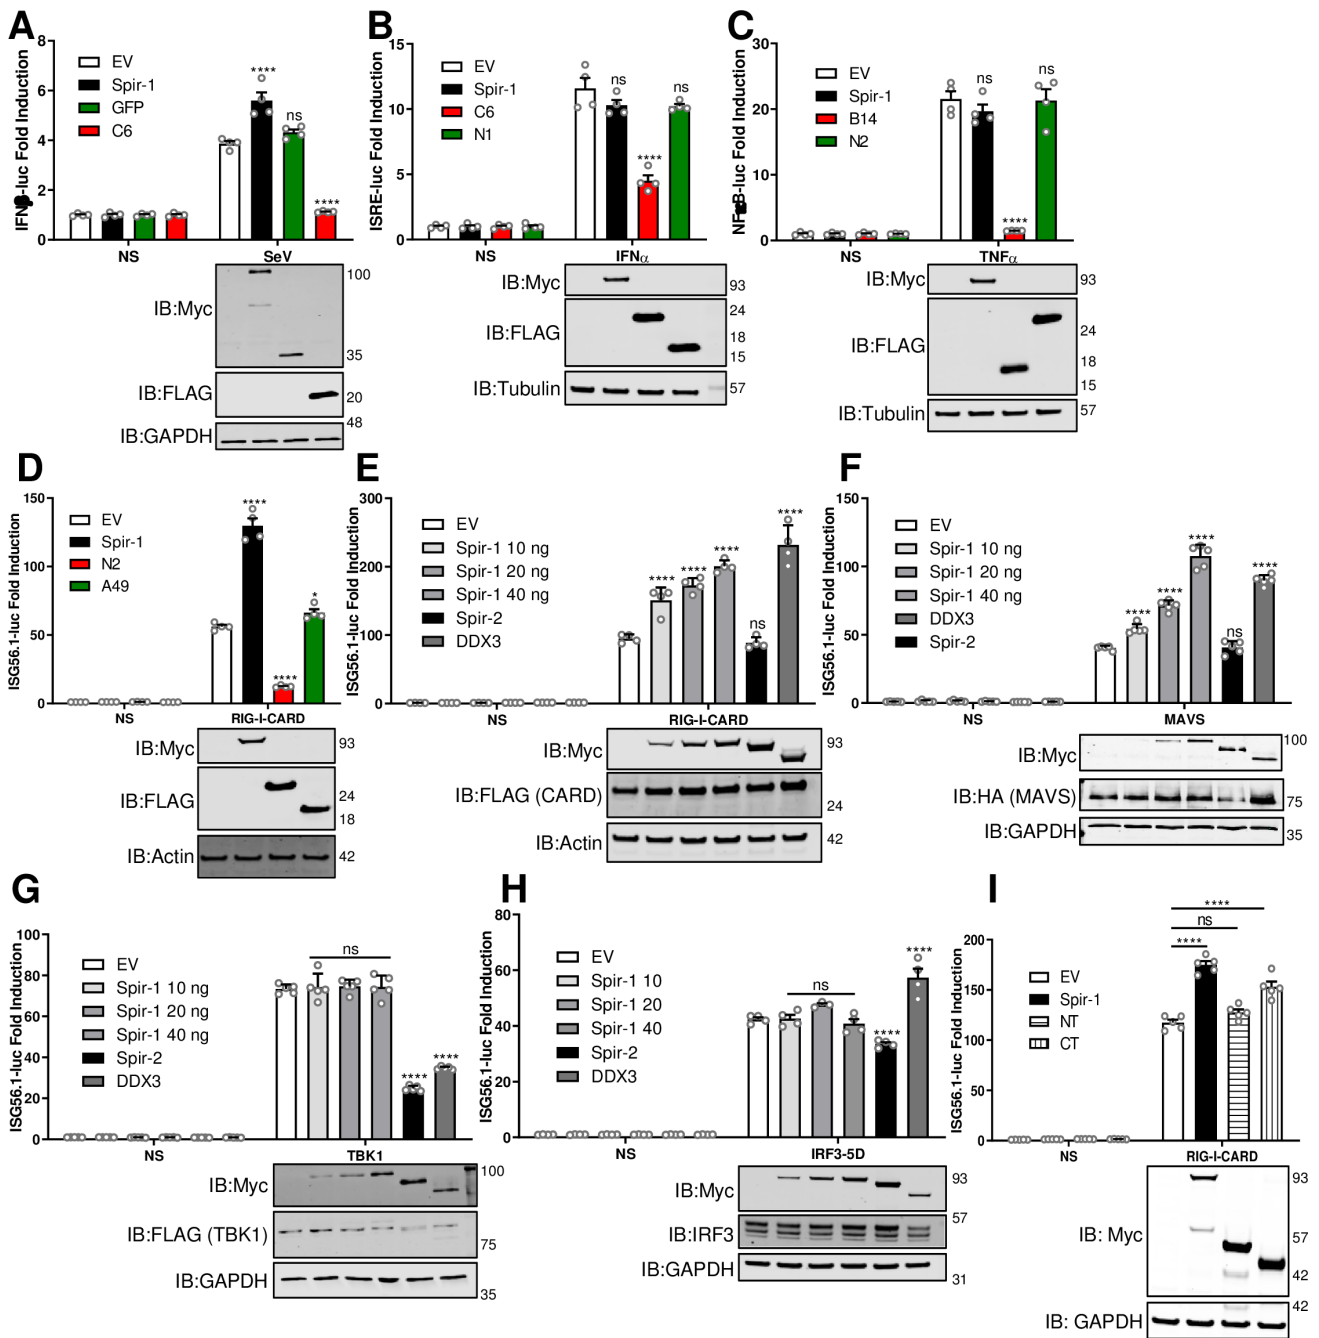

970

971 Fig 3

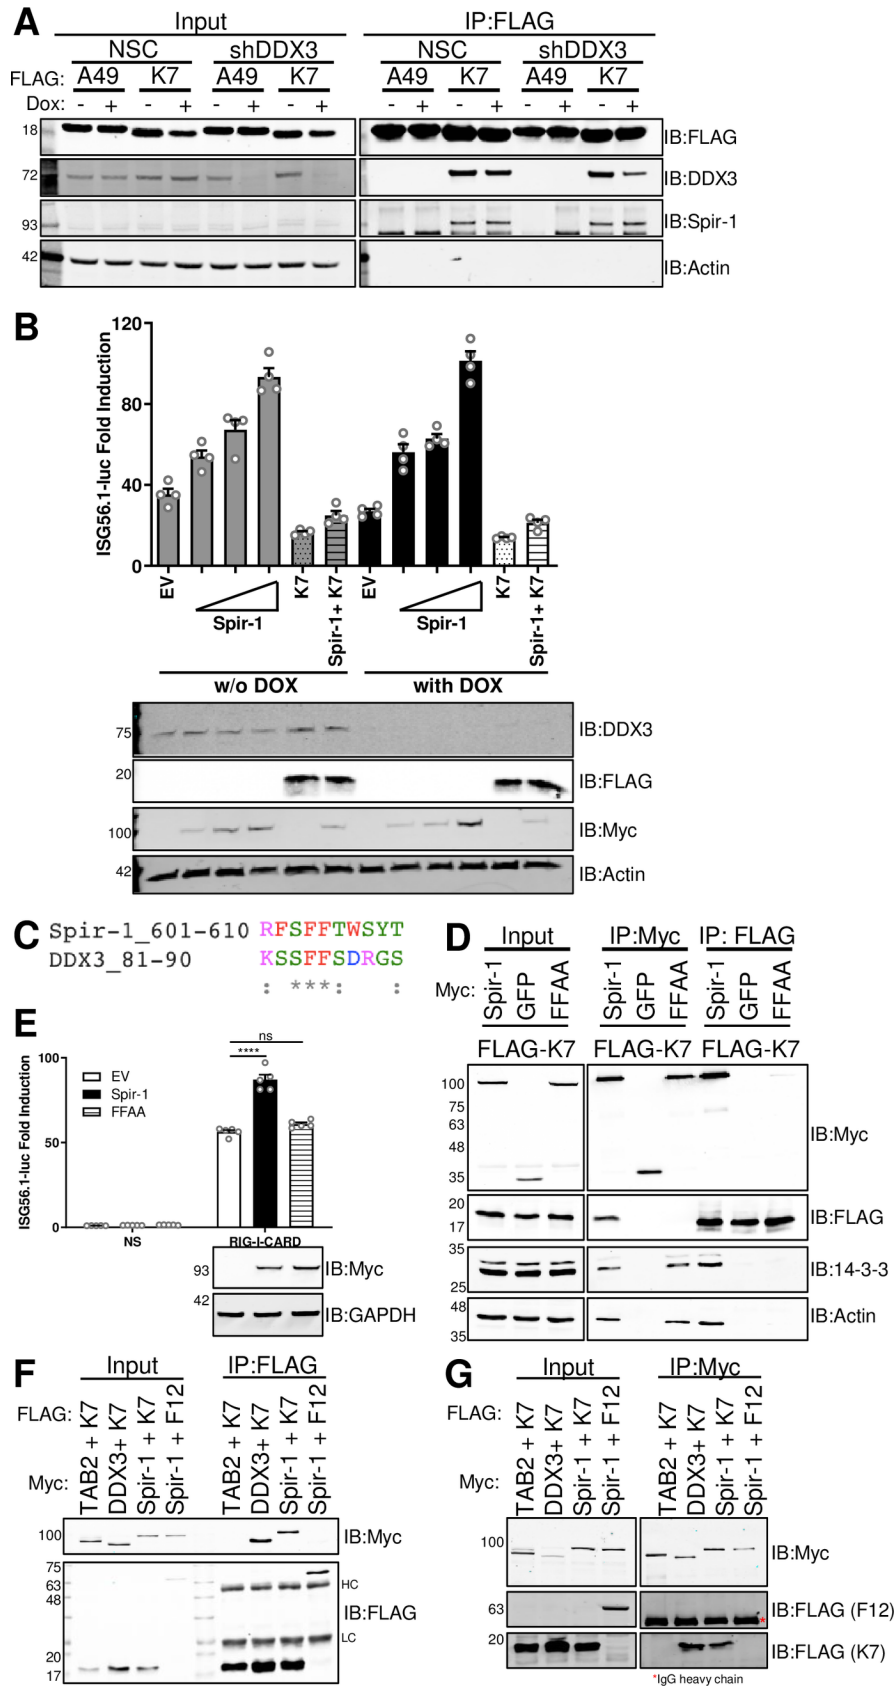

972

973

Fig 4

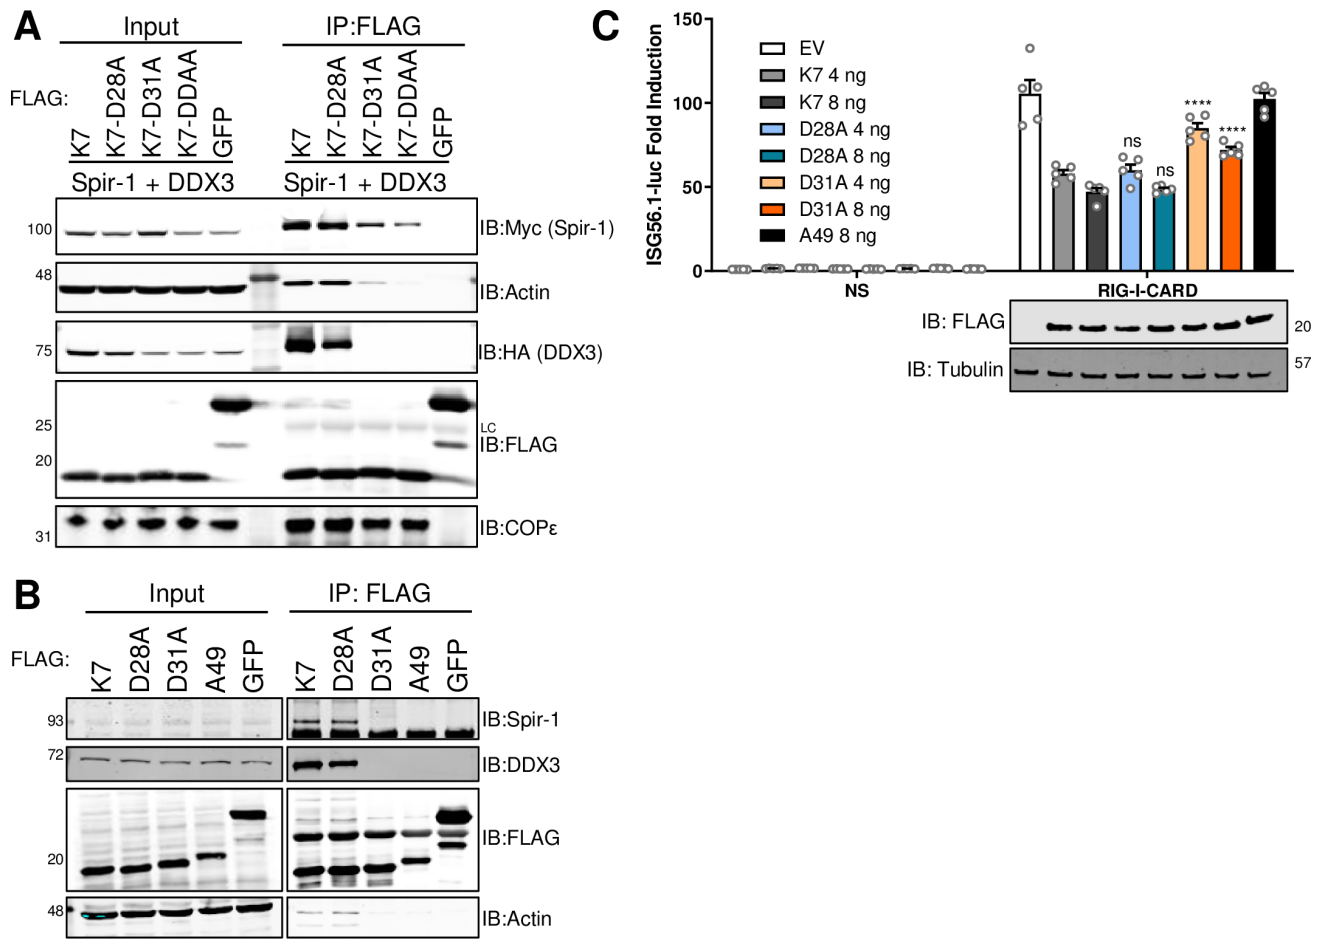

974

975

Fig 5

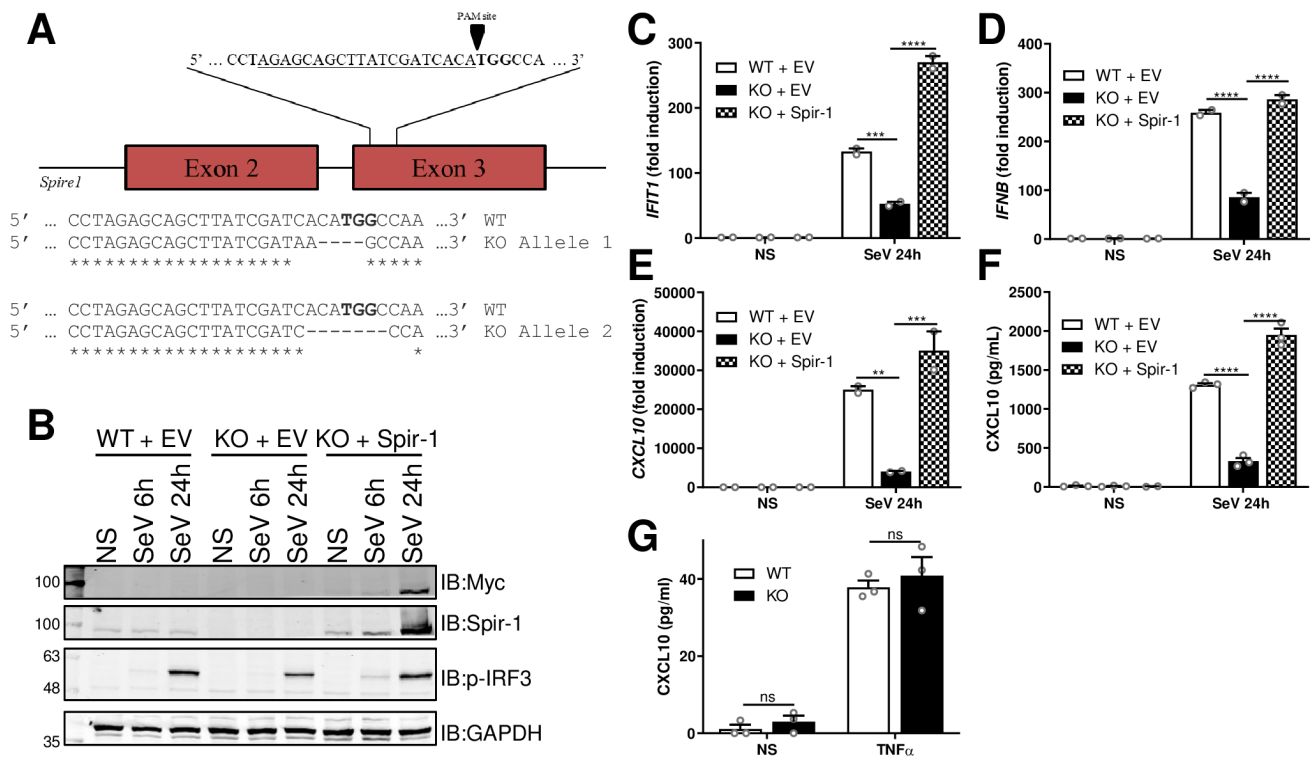

976



977 Fig 6

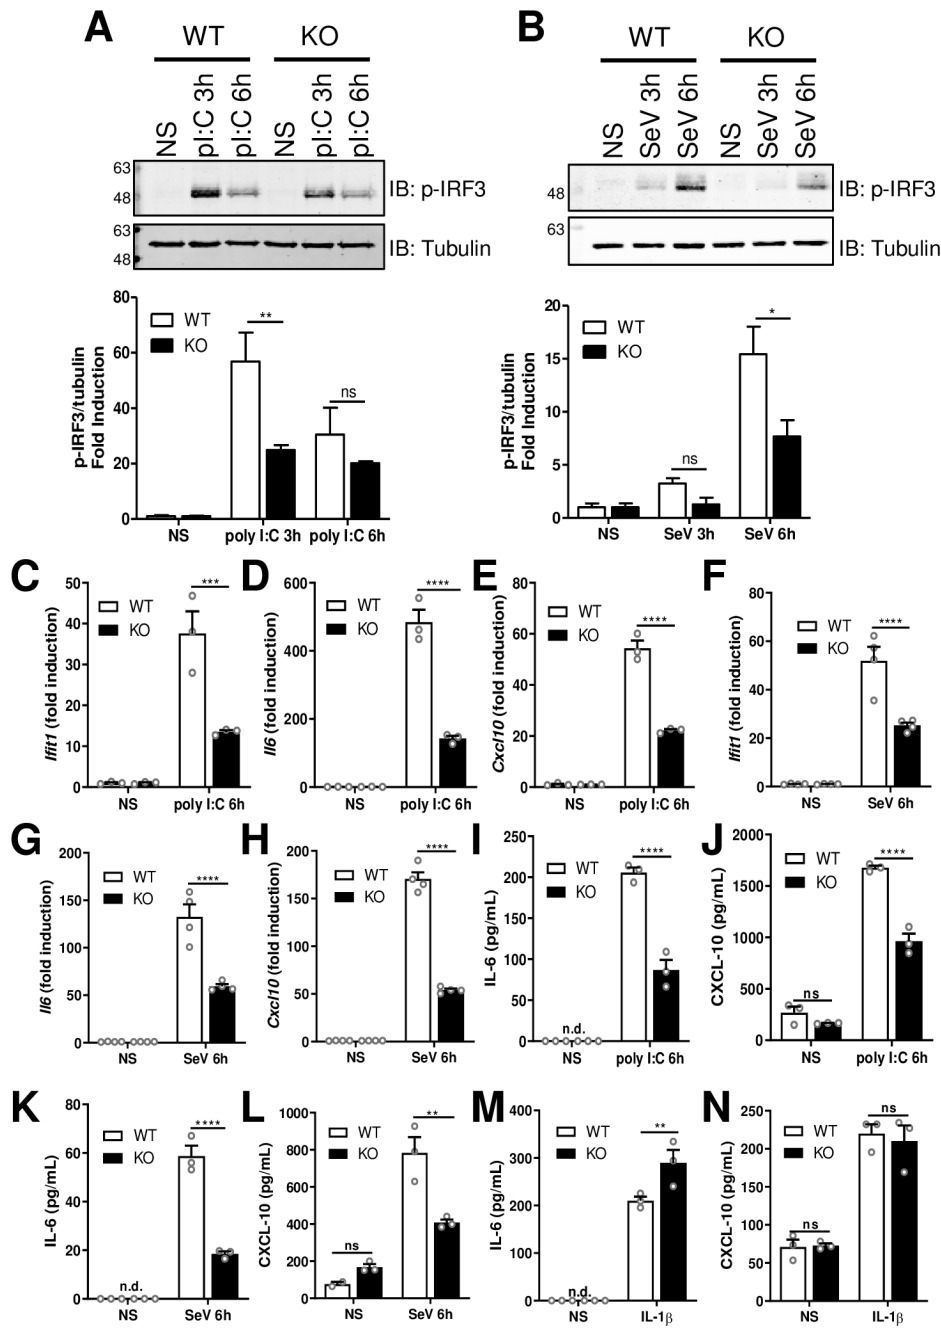

978

979 Fig 7

A

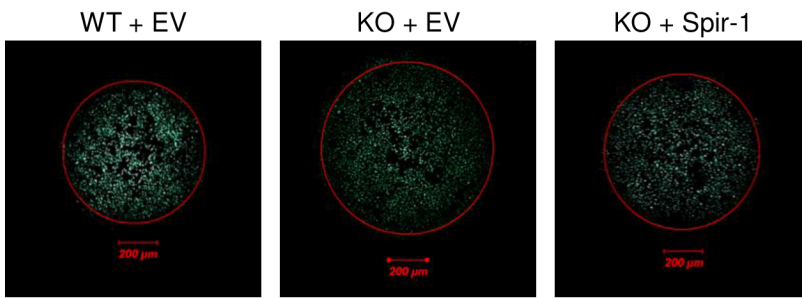

B

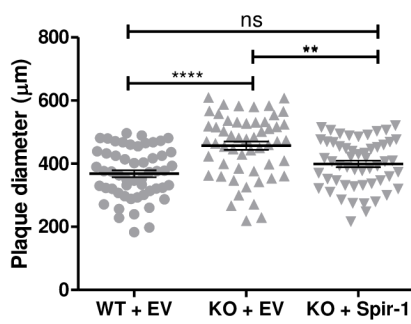

C

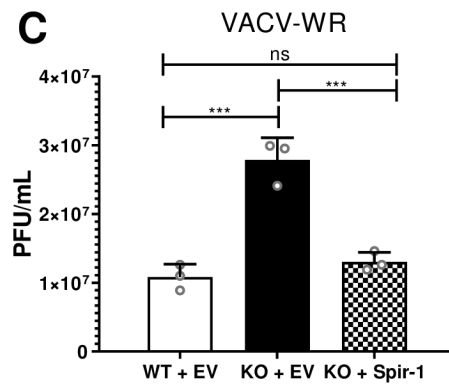

D

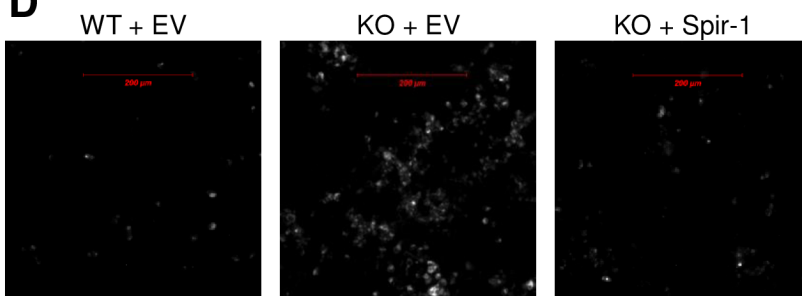

E

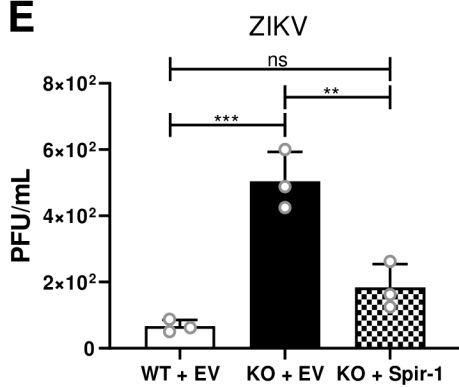

980

981

982

983 S1 Fig

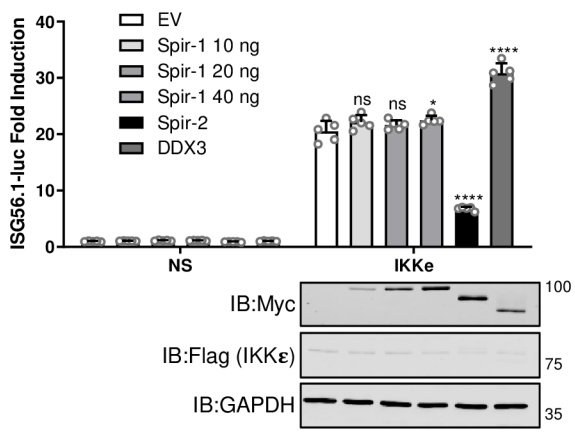

984
